# An Agent-Based Model of Monocyte Differentiation into Tumour-Associated Macrophages in Chronic Lymphocytic Leukemia

Nina Verstraete<sup>a,b</sup>, Malvina Marku<sup>a,b</sup>, Marcin Domagala<sup>a,b</sup>, H el ene Arduin<sup>a,b</sup>, Julie Bordenave<sup>a,b</sup>, Jean-Jacques Fourni e<sup>a,b</sup>, Lo ic Ysebaert<sup>a,b,d</sup>, Mary Poupot<sup>a,b</sup>, and Vera Pancaldi<sup>a,b,c</sup>

<sup>a</sup>INSERM, Cancer Research Center of Toulouse, 2 Avenue Hubert Curien, 31037, CEDEX 1 Toulouse, France; <sup>b</sup>Universit e Toulouse-III Paul Sabatier, Route de Narbonne, 31330 Toulouse, France; <sup>c</sup>Barcelona Supercomputing Center, Carrer de Jordi Girona, 29, 31, 08034 Barcelona, Spain; <sup>d</sup>Service d'H ematologie, Institut Universitaire du Cancer de Toulouse-Oncopole, 31330 Toulouse, France

1 Monocyte-derived macrophages help maintain tissue homeostasis and defend the organism  
2 against pathogens. In tumors, recent studies have uncovered complex macrophage popula-  
3 tions, including tumor-associated macrophages, which support tumorigenesis through cancer  
4 hallmarks such as immunosuppression, angiogenesis or matrix remodeling. In the case of  
5 chronic lymphocytic leukemia, these macrophages are known as nurse-like cells and they  
6 protect leukemic cells from spontaneous apoptosis contributing to their chemoresistance.  
7 We propose an agent-based model of monocyte differentiation into nurse-like cells upon  
8 contact with leukemic B cells *in vitro*. We performed patient-specific model calibrations using  
9 cultures of peripheral blood mononuclear cells from patients. Using our model, we were able  
10 to reproduce temporal survival dynamics of cancer cells in a patient-specific manner and  
11 to identify patient groups related to distinct macrophage phenotypes. Our results show a  
12 potentially important role of phagocytosis in the polarization process of nurse-like cells and  
13 in promoting cancer cells' enhanced survival.

## 14 Introduction

15 Advances in cancer therapies focusing on the tumor-infiltrating immune cells have led to a dramatic  
16 improvement in survival of some patients. These therapies are mainly based on the reactivation of immune  
17 cells that normally detect and eliminate cancer cells and whose cytotoxic activity is inhibited within tumors.  
18 However, the great progress offered by these approaches is hampered by the limited response rate that  
19 is observed in around two thirds of the patients (1). Reasons for the low response-rates are sought in  
20 the intrinsic characteristics of the tumor, but also in the presence of a specific tumor microenvironment  
21 (TME) that either prevents potential immune effector cells from entering the tumor or renders them  
22 ineffective in fighting malignant cells. The revolution of immune therapies resulted in a paradigm shift in  
23 our understanding of cancer and the more we discover about the various cells present in tumors and the  
24 specific ways in which they interact with each other, the better we will be able to tune the TME to arrest  
25 tumor growth.

26 In recent years, the research focus has been mostly on anti-tumoral T lymphocytes but in many cancers  
27 the presence of myeloid cells interferes with their killing action. In this project, we aim to better characterize  
28 the myeloid cells which protect the cancer cells from attack by T cells and promote tumor growth. It has  
29 long been known that tumors involve high levels of inflammation and for this reason macrophages are  
30 found in abundance in tumor biopsies (2, 3). Macrophages derive either from circulating monocytes or  
31 from embryonic progenitors (4), and are usually described to be in two opposite states as pro-inflammatory  
32 (M1) or anti-inflammatory (M2) macrophages, depending on their environmental signals (5, 6). However,  
33 recent single-cell studies identified a broader spectrum of phenotypes also impacting their specific functions  
34 such as phagocytosis, immunoregulation, matrix deposition, tissue remodeling and tumor resistance to  
35 therapy (7, 8). In tumors, macrophages can be educated by the cancer cells to promote their growth,  
36 becoming Tumor Associated Macrophages (TAM) (3, 9). Activation of the TAM polarization pathway  
37 leads to the secretion of several cytokines, such as CXCL12/13, IL-10, and IL-6/IL-8, which are reported to  
38 have pro-tumoral effect (10, 11), providing protection to the cancer cells.

39 A similar ecology of cancer cells and macrophages is established in the case of Chronic Lymphocytic  
40 Leukemia (CLL), a blood-borne malignancy characterized by the accumulation of large quantities of  
41 CD19+/CD5+ B cancer cells (hereafter, CLL cells). These cells can be encountered in the bloodstream but

42 also in lymphoid organs (bone marrow, spleen and lymph nodes), forming proliferating centers in which they  
43 accumulate at high densities, promoting disease progression (12–15). CLL cells are unable to proliferate on  
44 their own and need to migrate to proliferation centers where they encounter a supportive TME comprising  
45 T cells, stromal cells and TAM, which are called Nurse-Like Cells (NLCs) in this pathology (16–18). It  
46 has been widely reported that NLCs are crucial in rescuing CLL cells from spontaneous apoptosis and are  
47 important in attracting them to the proliferation centers (19–22). While therapies for CLL patients have  
48 mostly been targeting the cancer cells, it is increasingly apparent that many drugs altering the TME and  
49 controlling these complex interactions can benefit patients.

50 Similarly to cancer cells in solid tumors, CLL cells are able to induce the differentiation of monocytes  
51 into NLCs through direct contact and cytokine production. This favors the establishment of a pro-tumoral  
52 environment, protecting the leukemic cells from spontaneous apoptosis, and often leads to therapy resistance  
53 (23). One of the limitations in the study of TAM is the difficulty in identifying them in bulk tumor  
54 samples, due to their close similarity with other macrophages that are also present in the TME. However,  
55 although NLCs and M2-type macrophages display a similar profile in the CLL microenvironment (24),  
56 we showed that some distinctions can be highlighted, such as high expression of the RAGE membrane  
57 receptor, the HIF1 $\alpha$  and VEGF/EGF transcription factors in NLCs (25). Given the nurturing properties  
58 of NLCs in the CLL microenvironment, a high number of NLCs has been reported to lead to disease  
59 progression and shorter overall survival (26, 27). It has also been reported that NLCs express high levels  
60 of stromal-derived factor 1- $\alpha$  (SDF-1 $\alpha$ ), a potent chemoattractant for CLL cells inducing their migration  
61 and pseudo-emperipoiesis, corresponding to the crawling of entire CLL cells under macrophages without  
62 being internalized (28). Beside release of soluble factors, NLCs can also rescue CLL cells by direct contact  
63 (29) and promote CLL cell survival through LFA-3/CD2 interactions (30). Other molecules released by  
64 NLCs such as BAFF, BDNF and APRIL have been reported to support survival of CLL cells (31, 32).  
65 Based on these lines of molecular evidence, we derived general rules of interaction between cancer cells  
66 and monocytes to explore the mechanisms of cell-cell interactions that lead to the formation of NLCs.  
67 Importantly, the formation of NLCs can be observed and studied with a biologically relevant *in vitro* system  
68 in which patient-derived Peripheral Blood Mononuclear Cells (PBMCs) can be cultured for up to 13 days.  
69 PBMC are usually composed of 1-3% monocytes and >95% CLL cells, depending on the patient and disease

70 stage. Heterologous *in vitro* co-cultures of healthy monocytes and patient-derived CLL cells can also be  
71 used to produce NLCs in the absence of any other cell types. These two systems constitute a great resource  
72 to identify the processes that take place during the differentiation of monocytes into macrophages and  
73 their polarization into NLCs, like cell adhesion, phagocytosis performed by macrophages and NLCs and the  
74 accumulation of CLL cells around NLCs. Moreover, controllable settings in this experiment allow a detailed  
75 investigation of the conditions that are necessary and sufficient for NLC production, and the generated  
76 data can be used to propose computational models of this process and fit their parameters.

77 Agent-based models (ABMs) represent a discrete modeling approach that enables the simulation of the  
78 dynamics of populations of individuals in an environment. In principle, ABMs describe the interactions of  
79 decentralized agents which can be grouped into classes defined by their own characteristics and behavioral  
80 rules in space and time. This structure enables us to study emergent global behaviors at the population level  
81 resulting from properties of individual cells and their interactions (33, 34). Importantly, the deterministic  
82 or stochastic dynamics is spatio-temporal, enabling the identification of spatial patterns of individuals in  
83 time. In cancer biology, ABMs have been widely used to simulate the dynamics of diverse immune and  
84 cancer cells populations (35–38). Specifically, models have investigated properties of tumor morphology,  
85 adaptation of cancer cells in the TME, mutations and phenotype diversity, cell plasticity, the role of the  
86 extracellular matrix, and the effect of drugs and nutrition on tumor survival and proliferation (39–45).  
87 Recent works focusing more specifically on macrophages in the TME of solid tumors have mostly exploited  
88 ODE approaches (46–50). Some ABMs have also been developed to describe the molecular mechanisms  
89 controlling macrophage polarization, but they do not include cellular interactions with cancer cells (51).

90 Over the years, a number of computational tools for implementing ABMs have been developed, including  
91 advanced methods for incorporating both inter- and intra-cellular interactions to simulate the global  
92 dynamics of multicellular systems (52, 53). Here, we present an ABM implemented in Netlogo (54, 55)  
93 aiming to reproduce monocyte differentiation into macrophages and polarization into NLCs upon contact  
94 with CLL cells. We calibrate it on *in vitro* cultures of CLL patients' PBMC and perform extensive parameter  
95 optimization using parameter exploration based on a genetic algorithm integrated in the OpenMOLE  
96 framework (56). The model allows us to gain quantitative insights into important factors and cellular  
97 processes in this biological system, such as phagocytosis and anti-apoptotic signaling mechanisms that

98 protect CLL cells from apoptosis.

## 99 **Results**

100 **NLC formation *in vitro*.** In order to observe the formation of NLCs *in vitro*, autologous cultures from 9 CLL  
101 patients' PBMCs were monitored during 13 days Fig. 1A. Daily observation allowed us to see outgrowth  
102 of big, adherent macrophages, whose phenotype was further assessed by flow cytometry (Fig. S1). An  
103 example of visualization of NLCs by fluorescence microscopy is shown in Fig. 1B. CLL cell survival over  
104 time was monitored through measurements of the cell concentration and viability Fig. 1C. CLL cell viability  
105 represents the proportion of living cells within the cancer cell population, whereas CLL cell concentration is  
106 the percentage of remaining cells compared to their initial number at seeding. Based on the changes in  
107 maturing NLC morphology, the expression of myeloid markers on their surface (CD11c, CD14, CD16,  
108 CD163, CD206), and considering the overall survival state of CLL cells, we have distinguished 4 stages of  
109 the culture, allowing us to infer individual behaviors in the ABM design:

- 110 • **Phase I (Day0 - Day2).** The initial state of the culture is characterized by the presence of  
111 approximately 4.5% apoptotic CLL cells (on average over the 9 patients) as a result of the initial lack  
112 of pro-survival agents and post-isolation stress. Monocytes attach to the plastic of the culture dish  
113 and start differentiation into macrophages. Based on the CLL cell countings, the phagocytosis activity  
114 of the differentiating monocytes is low, resulting in a decrease in the overall CLL cell viability.
- 115 • **Phase II (Day2 - Day6).** Maturation of macrophages and their further polarization into NLCs  
116 occurs. Phagocytosis of the dead and apoptotic CLL cells intensifies (efferocytosis), leading to increase  
117 of global CLL cell viability and decrease of cell concentration. The specific phenotype of macrophages  
118 is not fully attributed at this stage of the culture, as these cells are still undergoing a differentiation  
119 process and could potentially belong to various subsets within the M1 (proinflammatory) to M2  
120 (anti-inflammatory) continuum.
- 121 • **Phase III (Day6 - Day9).** Macrophages and NLCs reach full maturation. We observe a tendency  
122 for CLL cells to accumulate around NLCs Fig. 1B as a result of chemoattraction (21, 57). There is  
123 no clear up- or down-ward trend in CLL cell viability and concentration.

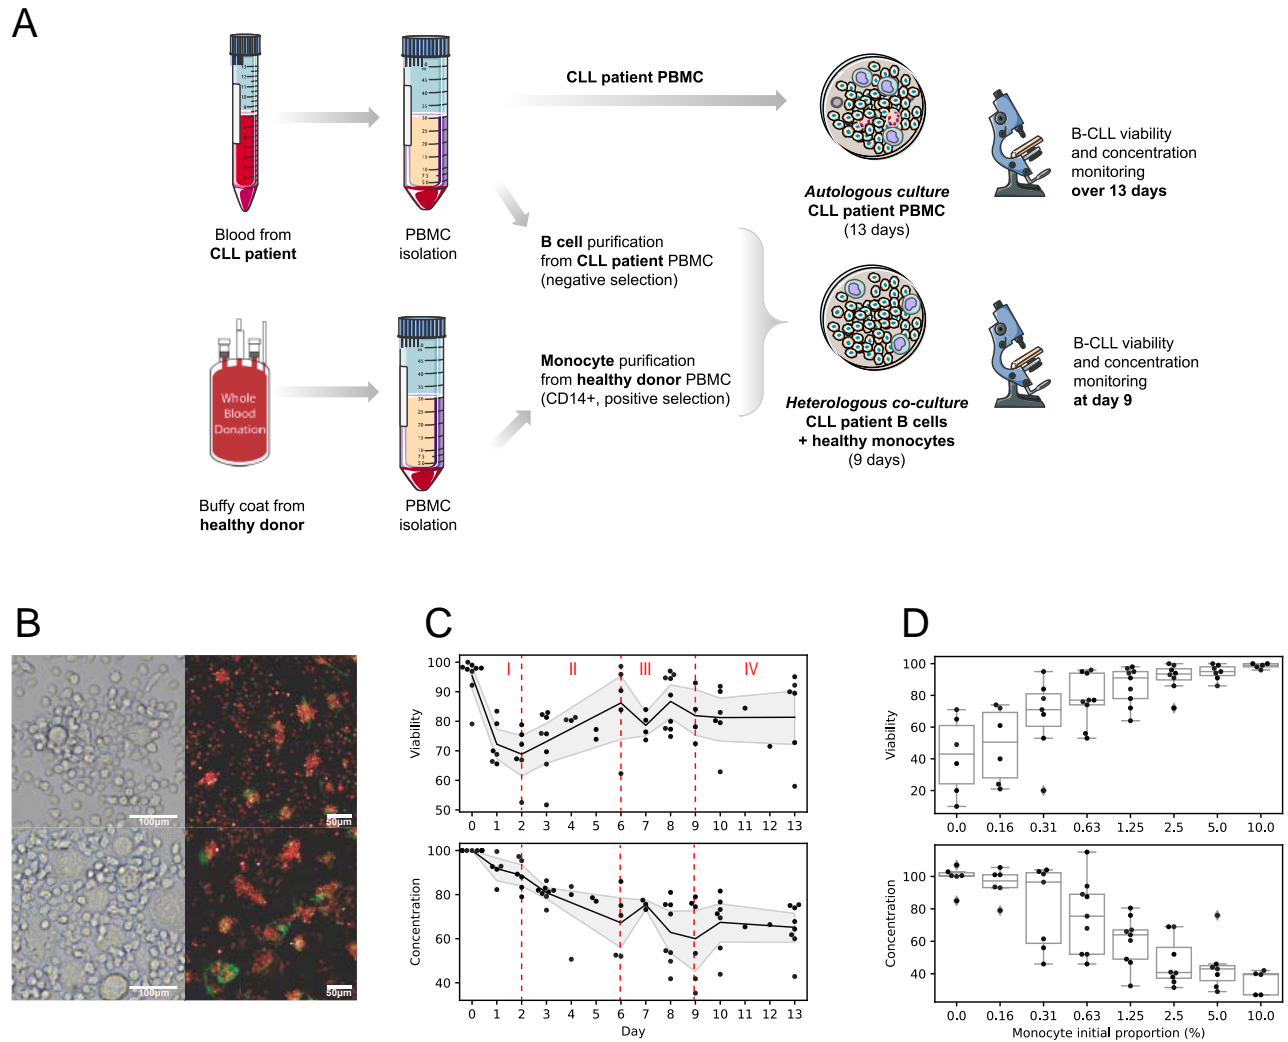

**Fig. 1. Experimental setups and datasets from *in vitro* PBMC cultures from CLL patients.** **A) Experimental set-up.** Autologous and heterologous co-cultures of CLL cells and monocytes leading to NLC formation. In autologous cultures, Peripheral Blood Mononuclear Cells (PBMC) were isolated from CLL patients' blood samples and cultured *in vitro* for 13 days. The cell concentration and viability of CLL cells was monitored by hemocytometer and flow cytometry AnnexinV/7AAD staining, respectively. **B) Visualization of NLCs at 10 days of *in vitro* culture from two different patients** in bright-field and immunofluorescence microscopy (NLC: green staining; CLL cells: red staining). **C) Time course datasets produced from the PBMC autologous cultures from 9 patients.** CLL cell survival was monitored by viability assay and concentration measurements. The black curve corresponds to the mean value averaged over the available data. The shaded area corresponds to the 95% confidence interval. The complete dataset showing patients variability is available in Supplementary Material (Fig. S2). Time points at which data was not available for at least 4 patients were removed from downstream analysis (Day 4, 5, 11, and 12). **D) Heterologous co-cultures.** Monocytes from healthy donors and B cells from CLL patients were co-cultured to assess the relationship between the initial density of monocytes in the culture and the level of survival of CLL cells after 9 days. The x-axis displays different monocytes initial proportions (not to scale for clarity). Measurements were performed on co-cultures of B cells from 5 CLL patients and monocytes from 2 healthy donors. The complete data showing inter-patient and inter-donor variability is available in Supplementary Material (Fig. S3).

124 • **Phase IV (Day9 - Day13)**. The culture enters the steady state phase. CLL cell viability remains  
125 around 80% and cell concentration reaches 60% of the initial concentration.

126 Importantly, CLL cell division was not implemented in this *in vitro* model, as CLL cells are known to  
127 proliferate only in the specific conditions found for example in lymph nodes, whereas they become quiescent  
128 in peripheral blood (58, 59).

129 Additionally, to study the potential effect of initial proportion of monocytes in CLL cell survival,  
130 heterologous co-culture experiments were performed by mixing CLL cells from patients together with  
131 varying proportions of healthy monocytes, to produce cell viability and concentration readouts at Day 9  
132 of the co-culture Fig. 1D. We have observed that CLL cell survival at the beginning of the steady state  
133 phase (Day 9) could be dependent on the monocytes initial proportion. Of note, CLL patients' blood  
134 sample quantities and their insufficient monocyte counts did not allow us to perform this experiment in an  
135 autologous setting with B cells and monocytes from the same patient.

136 **An agent-based model of NLC formation.** The CLL cell survival dynamics observed *in vitro* can be described  
137 as the evolution of a system composed by two main cell populations (Fig. 2A): cancer cells (CLL cells)  
138 and myeloid cells (monocytes, macrophages, NLCs). In our model, cancer cells can be found in 3 states,  
139 depending on their life status: (i) *NeedSignal* (red arrow), when they are still above the apoptosis  
140 threshold and are attracted to *NLCs*, (ii) *Apoptotic* (yellow arrow), an irreversible state in which the cells  
141 will continue to move and eventually die and (iii) *Dead* (grey arrow), when the cells have reached the death  
142 threshold and will remain immobile. Myeloid cells can be found under 3 states as well, corresponding  
143 to their differentiation and polarization state: (i) *Monocyte*, (ii) *Macrophage* or (iii) *NLC*, characterized  
144 by specific properties and spatio-temporal behaviors including movement, phagocytosis (efferocytosis) or  
145 cell-cell interactions (Fig. 2B). From the dynamics shown in Fig. 1C, microscopy observations (Fig. 1B)  
146 and flow cytometry data on the evolution of the NLC phenotype (Fig. S1), we deduced several key processes  
147 that might determine the cells' interactions and state transitions. These include: chemoattraction of CLL  
148 cells to NLCs, a progressive adherence process of monocytes to the culture dish, corresponding to the  
149 monocyte-to-macrophage differentiation in the model, appearance of the first NLCs around Day 4, and the  
150 implementation of different levels of phagocytosis efficiencies depending on the myeloid class (*Monocyte*,  
151 *Macrophage*, *NLC*). The ABM of the co-culture of monocytes with CLL cells was implemented in NetLogo



152 (54, 55), in which space and time are discrete. Based on the experimental observation that macrophages and  
153 CLL cells concentrate at the bottom of the culture dish, the model was built in 2D, mimicking a projection  
154 of a cylindrical plate. Space is thus represented by a 2D lattice, where each cell occupies one spatial unit  
155 called “patch” of the size of a CLL cell ( $\sim 5\mu\text{m}$ ). We made the simplification that cancer cells and myeloid  
156 cells occupy the same surface. There can only be one cell per patch and cells can move only on surrounding  
157 empty patches, according to their class and their corresponding mobility parameters. The model time step  
158 is one hour. The simulation duration was set to 13 days, corresponding to the experimental time-course  
159 performed experimentally.

160 Briefly, at the beginning of the simulation, CLL cells and monocytes are instantiated in space randomly,  
161 with their class-specific property (**life** expectancy and **differentiation** time required for the monocyte-  
162 to-macrophage differentiation, respectively) set to values from characteristic distributions ( $\Gamma(x, \text{ns}_{\Gamma\alpha}^{\text{life-init}}$ ,  
163  $\text{ns}_{\Gamma\beta}^{\text{life-init}}$ ) and  $N(0, \text{mono}_{N\sigma}^{\text{diff}})$ , respectively). *Monocytes* will differentiate (gain of 1 unit at each time step)  
164 and will convert into *Macrophages* after reaching the differentiation threshold ( $\text{mono}_{\text{threshold}}^{\text{diff}}$ ). Cancer cells  
165 will decrease their **life** expectancy in a progressive manner (loss of 1 unit at each time step). When cancer  
166 cells reach the apoptosis threshold ( $\text{apo}_{\text{threshold}}$ ) and later the death threshold ( $\text{death}_{\text{threshold}}$ ), they will  
167 update their class from *NeedSignal* to *Apoptotic*, and from *Apoptotic* to *Dead*, respectively. Importantly,  
168 myeloid cells can phagocytose *Apoptotic* and *Dead* cancer cells with a characteristic efficacy, which depends  
169 on several class-specific parameters (phagocytosis efficiency, sensing distance and the movement probability  
170 of apoptotic cells), allowing efferocytosis, which corresponds to the clearance of apoptotic and dead cells  
171 from the culture environment. Besides phagocytosis, since certain macrophages in the M1-M2 spectrum  
172 could potentially kill the cancer cells (60), we implemented a killing efficiency for the *Macrophage* class  
173 so that they are able to actively kill cancer cells with a low efficiency (0-5%). After spending sufficient  
174 time in contact with cancer cells ( $\text{nlc}_{\text{threshold}}$ ), *Macrophages* will polarize into NLCs, representing a shift in  
175 the phenotype of myeloid cells from *Macrophage* class to *NLC* class. *NLCs* secrete anti-apoptotic signals  
176 which will provide protective effects to the cancer cells, allowing them to fight apoptosis and survive longer  
177 through a life extension period ( $\text{anti-apo}_{\text{boost}}$ ). This can be seen as supplemental hours for the cancer cells  
178 to remain alive, before entering the *Apoptotic* state.

179 A complete description of the different cell classes and rules is available in the Materials and Methods



180 section and as UML class diagrams in Fig. S4. The model features 19 parameters that were calibrated  
 181 through parameter exploration (Supplementary Table 1). We highlight that, due to our general approach  
 182 to model cellular interactions, the parameter values should be taken more qualitatively than quantitatively,  
 183 representing the different mechanisms at play at a more abstract level.

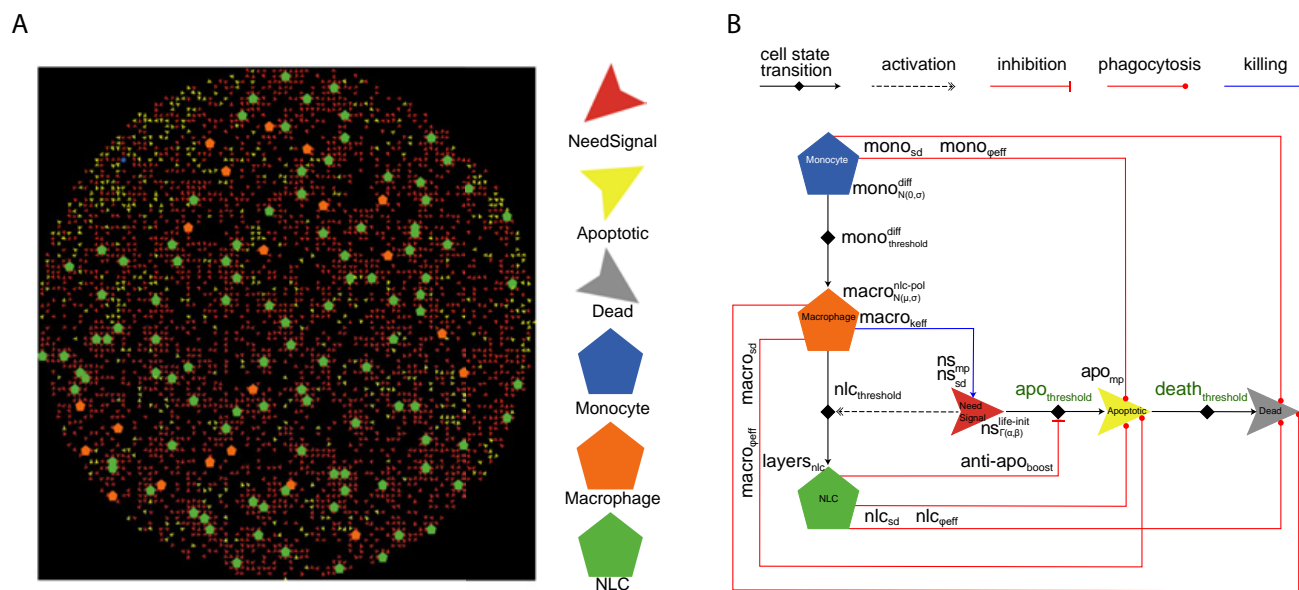

**Fig. 2. ABM representations.** **A)** Netlogo simulation of 5000 cells. Cancer cells are depicted as small arrows (red, yellow or grey for *NeedSignal*, *Apoptotic* or *Dead* state, respectively) and myeloid cells are depicted as pentagons (blue, orange or green for *Monocyte*, *Macrophage* or *NLC*, respectively). **B)** Schematic diagram of the agents' states and behaviors. Parameters optimized through the genetic algorithm are indicated next to their corresponding cellular processes, represented by arrows.

184 **Parameter space exploration.** Based on the two-dimensional ABM of monocyte-to-NLC differentiation in  
 185 presence of CLL cells described in the previous section, we performed multiple simulations, limiting the  
 186 parameters to values able to broadly reproduce the experimentally observed dynamics shown in Fig. 1C.  
 187 This empirical approach was used to estimate the ranges to be systematically explored for each parameter  
 188 (Supplementary Table 1). These include for example the parameters corresponding to the heterogeneous  
 189 process of differentiation of monocytes into macrophages ( $mono_{threshold}^{diff}$ ,  $mono_{N\sigma}^{diff}$ ) set at the beginning of  
 190 the co-culture. Parameters  $mono_{threshold}^{diff}$  and  $mono_{N\sigma}^{diff}$  were tested empirically with fixed values between  
 191 48h and 72h, and between 0h to 48h, respectively, since monocytes were observed to adhere to the plate  
 192 heterogeneously from Day 0 to Day 3. Parameters corresponding to the conversion of macrophages into  
 193 *NLCs* ( $N(macro_{N\mu}^{nlc-pol}$ ,  $macro_{Ns}^{nlc-pol}$ )) were also chosen from ranges allowing the *NLCs* to start appearing  
 194 around Day 4 and terminating their polarization around Day 8, as observed in the FACS data (Fig. S1).  
 195 To determine the exact parameter values able to reproduce the CLL cell survival dynamics observed

196 experimentally in the PBMC autologous cultures (Fig. 1C), we then performed an automated parameter  
197 search employing the non-dominated sorting genetic algorithm-II (NSGA-II, (61, 62), Fig. 3A), implemented  
198 in openMOLE (56). This procedure systematically generates populations of parameter sets and evolves  
199 the candidate solutions towards higher values of two objective fitness functions, minimizing the difference  
200 between the simulated CLL cell viability and concentration and the corresponding experimental time-course  
201 data shown in Fig. 1C. Simulations were run on 1000 cells using averaged monocyte initial proportion and  
202 averaged apoptotic cell initial proportion over the 9 patients (1.28% and 4.55%, respectively).

203 A total of 98 parameter sets were obtained as optimal solutions from the Pareto front, whose convex  
204 shape indicates the anti-correlated nature of the two fitnesses (Fig. 3B). Evolution of the fitness values on  
205 cell viability and concentration dynamics showed that the NSGA-II algorithm converged in early generations  
206 ( $\sim 500$ ), ensuring that after 20'000 generations the parameter space was sufficiently explored to provide  
207 confidence in the resulting optimized parameters (Fig. S5). Generally, in multi-objective optimization  
208 methods, choosing a specific set of parameters from the optimization results requires both biological and  
209 computational reasoning. In our case, we particularly focused on three parameter sets, maximizing fitness  
210 on viability, concentration, and the knee-point on the Pareto front (Fig. 3B,C), defined as the point on the  
211 Pareto front that optimizes both constraints equally well and which usually represents the best trade-off.  
212 In addition, the distribution of each parameter value within solutions on the Pareto front (Fig. 4A) allows  
213 us to check for consistency between the result of the optimization algorithm and our biological observations.  
214 For example, monocyte phagocytosis efficiency ( $\text{mono}_{\phi_{\text{eff}}}$ ) is skewed towards low values while macrophage  
215 phagocytosis efficiency ( $\text{macro}_{\phi_{\text{eff}}}$ ) is skewed towards higher values. This is consistent with the experimental  
216 observation that phagocytosis in the first days (Day 0-2) is negligible, since dead cells accumulate and  
217 viability decreases. Indeed, in the first days, monocytes are non-adherent and, it is only when they adhere  
218 to the plate and differentiate into functional macrophages that we observe dead cells getting cleared from  
219 the population, with viability increasing again around Day 3-4 of the culture. It has been also reported  
220 that adherence is required to prime monocytes for their phagocytic functions (63–65). Furthermore, high  
221 values of  $\text{anti-apo}_{\text{boost}}$  are selected, indicating the importance of the protective role of NLCs for CLL cells  
222 in the observed dynamics. Pearson correlations between the parameters and the two fitness functions  
223 shed light on the most important parameters defining the model fit (Fig. 4B,C). They suggest a strong

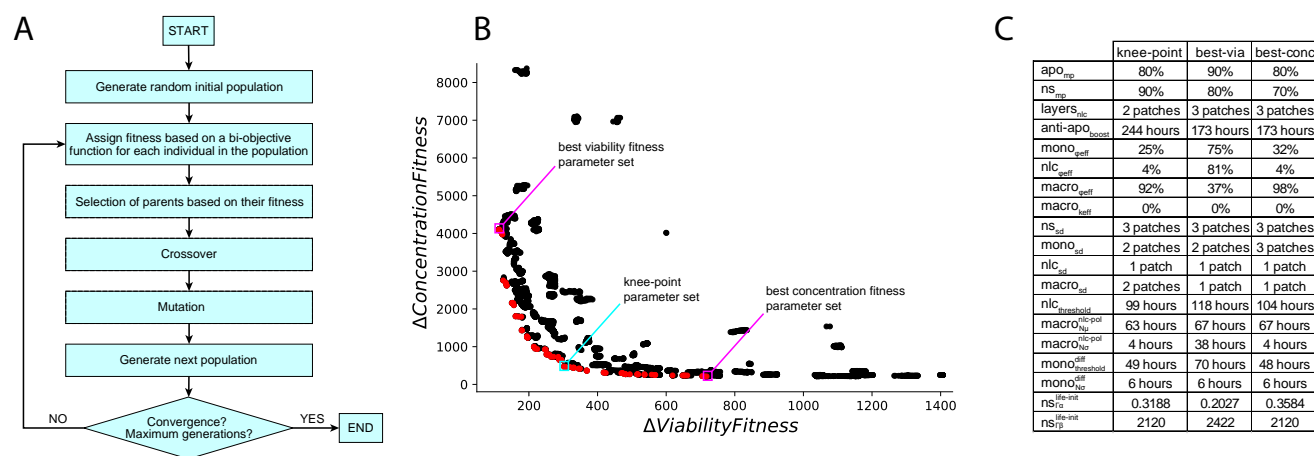

**Fig. 3. Overview of strategy and results of the parameter exploration.** **A)** Schematic diagram of the bi-objective genetic algorithm. Flow chart of the NSGA-II algorithm procedure. The algorithm parameters and procedure details are described in the Materials and Methods section. **B)** Pareto front of the bi-objective optimization. The NSGA-II genetic algorithm evaluates each explored set of parameters according to 2 objective functions corresponding to CLL cell viability and concentration (10 time points, least squares method), along 20'000 generations. The Pareto front, depicted in red, contains 98 non-dominated solutions. The knee-point parameter set is in a cyan box and the parameter sets performing best on viability and concentration dynamics are in magenta boxes. **C)** Representative parameter sets. The parameters listed here correspond to the knee-point parameter set, and to the parameter sets fitting best viability and concentration dynamics.

224 role for the CLL cells' life expectancy heterogeneity (i.e. parameters of the Gamma distribution of the  
 225 cancer cells' life property value at initialization) and of the macrophages' phagocytosis efficiency in  
 226 obtaining a higher fitness for viability (Fig. 4B). Other parameters involved in monocyte-to-macrophage  
 227 differentiation timing ( $\text{mono}_{\text{threshold}}^{\text{diff}}$ ,  $\text{mono}_{N\sigma}^{\text{diff}}$ ), macrophage-to-NLC polarization ( $\text{nlc}_{\text{threshold}}$ ,  $\text{macro}_{N\mu}^{\text{nlc-pol}}$ ),  
 228 or NLC phagocytosis efficiency ( $\text{nlc}_{\phi\text{eff}}$ ) are the most important to fit the concentration readout (Fig. 4C).  
 229 This suggests that different mechanisms might be at play in reproducing the experimentally observed  
 230 dynamics. Additionally, we cannot exclude that other parameter sets from the Pareto front reach the  
 231 expected outcomes on viability and concentration equally well, due to potential coupling between some  
 232 parameters (Fig. S6). Full investigation of the implications of these parameter correlations in the model  
 233 would require further experimental validation and is beyond the scope of this work.

234 **Model performance in recapitulating averaged patient CLL cell survival dynamics.** We evaluated the 3  
 235 Pareto front's representative parameter sets against experimental data from CLL cell survival in PBMC  
 236 autologous cultures averaged from 9 different patients and observed that the knee-point set performed  
 237 the best as measured by the Normalized Root Mean Squared Errors (NRMSE) and  $R^2$  values (knee-point  
 238 set:  $\text{NRMSE}_{\text{via}}=0.2$ ,  $R_{\text{via}}^2=0.5$  and  $\text{NRMSE}_{\text{conc}}=0.13$ ,  $R_{\text{conc}}^2=0.85$ ; best-viability set:  $\text{NRMSE}_{\text{via}}=0.16$ ,  
 239  $R_{\text{via}}^2=0.66$  and  $\text{NRMSE}_{\text{conc}}=0.53$ ,  $R_{\text{conc}}^2=-1.66$ ; best-concentration set:  $\text{NRMSE}_{\text{via}}=0.29$ ,  $R_{\text{via}}^2=-0.07$  and  
 240  $\text{NRMSE}_{\text{conc}}=0.13$ ,  $R_{\text{conc}}^2=0.84$ , Fig. 5A-C). For this reason, the knee-point set was chosen for further

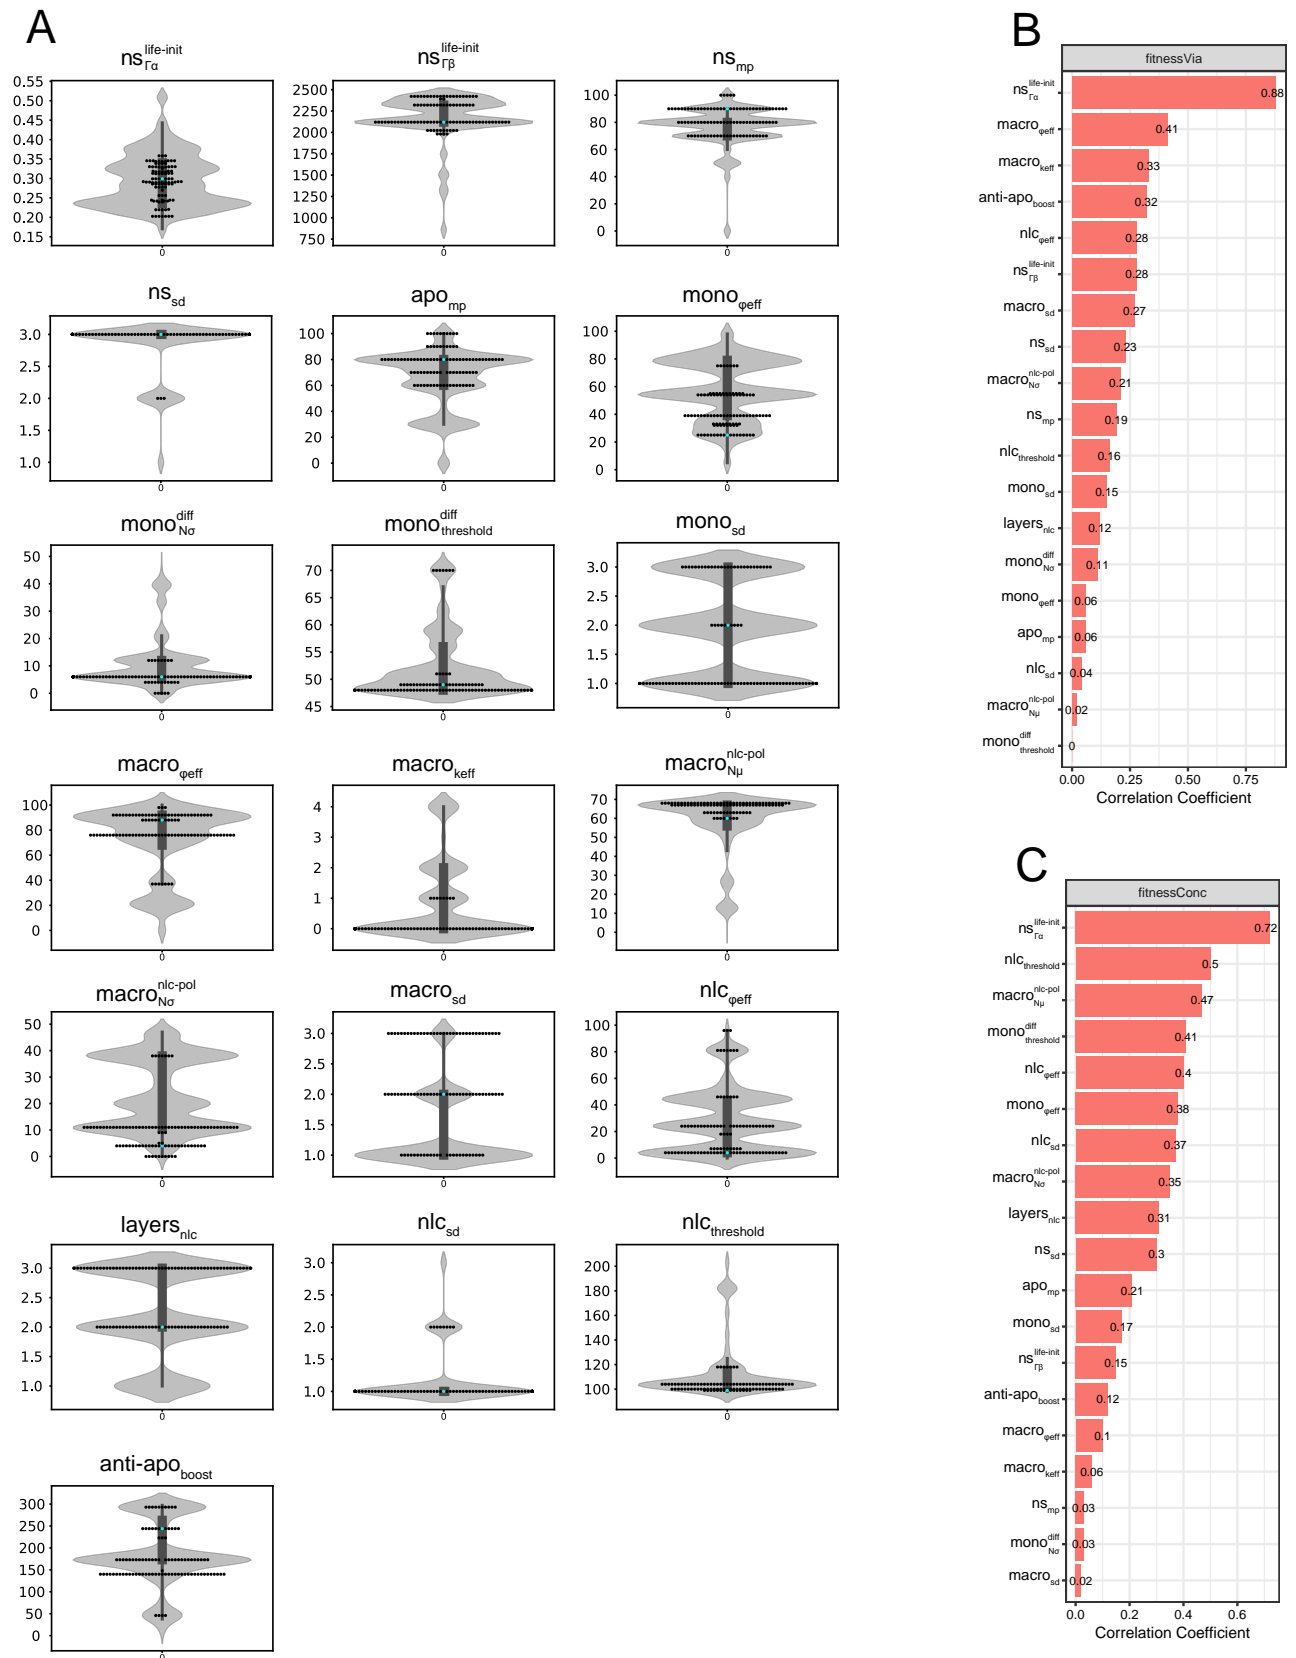

241 evaluation of the model performance and for predictive power. One of the main input variables in the  
242 model are the initial concentrations of monocytes and CLL apoptotic cells in the culture. We therefore  
243 hypothesized that the initial monocyte and apoptotic cell concentration in our cultures could be factors that  
244 partially explain the broad differences and large dispersion of experimental measurements from different  
245 patients (Fig. 1C,D, Fig. 5 and Fig. S2, S3). To investigate this, we therefore performed several simulations  
246 with varying initial proportions of monocytes and estimated the CLL cell viability and concentration at  
247 Day 9. We compared our predictions to experiments from heterologous co-cultures of healthy monocytes  
248 with patient CLL cells in which we could vary the initial (healthy) monocyte concentration at will (Fig.  
249 1D). The results in Fig. 5D show that the model based on autologous culture datasets is able to predict  
250 viability and concentration values observed experimentally with changing initial monocyte proportion in a  
251 heterologous culture with reasonable accuracy on both viability and concentration readouts ( $\text{NRMSE}_{\text{via}}=0.2$   
252 and  $\text{NRMSE}_{\text{conc}}=0.29$ ).

253 We further tested whether we could fit patient-specific dynamics by using patient-specific initial monocyte  
254 and initial apoptotic cell proportions as inputs to our model (Supplementary Table 2). In this context, our  
255 predictions of CLL cell viability and concentration also partly matched the experimentally observed profiles  
256 (Fig. S7).

257 **Parameter sensitivity analysis.** To better understand the influence of specific parameters on the overall  
258 CLL cell survival dynamics, we performed a sensitivity analysis using the one-factor-at-a-time method (66),  
259 with which each parameter value is varied while leaving the others at their optimized value extracted from  
260 the knee-point parameter set (Fig. 6). As described previously, several parameters, like heterogeneity of  
261 the cancer cells life expectancy, phagocytosis efficiency, monocyte-to-macrophage differentiation timing,  
262 and macrophage-to-NLC polarization timing, affect the viability and concentration dynamics the most  
263 (absolute values of correlation coefficients  $> 0.4$ , Fig. 4 B,C). We first explored the importance of CLL cells'  
264 inherent survival heterogeneity by varying the shape and rate parameters of the Gamma distribution used to  
265 initialize the life expectancy of each cancer cell ( $\text{ns}_{\Gamma\alpha}^{\text{life-init}}$ ,  $\text{ns}_{\Gamma\beta}^{\text{life-init}}$ , Fig. 6). Heterogeneity of macrophages'  
266 initial state of polarization towards NLCs was also shown to influence the survival dynamics as displayed  
267 by the simulations using varying values for this parameter ( $\text{macro}_{\text{N}\mu}^{\text{nlc-pol}}$ ). We also investigated the effect of  
268 varying the timing of monocyte differentiation into macrophages ( $\text{mono}_{\text{threshold}}^{\text{diff}}$ ) but did not observe any

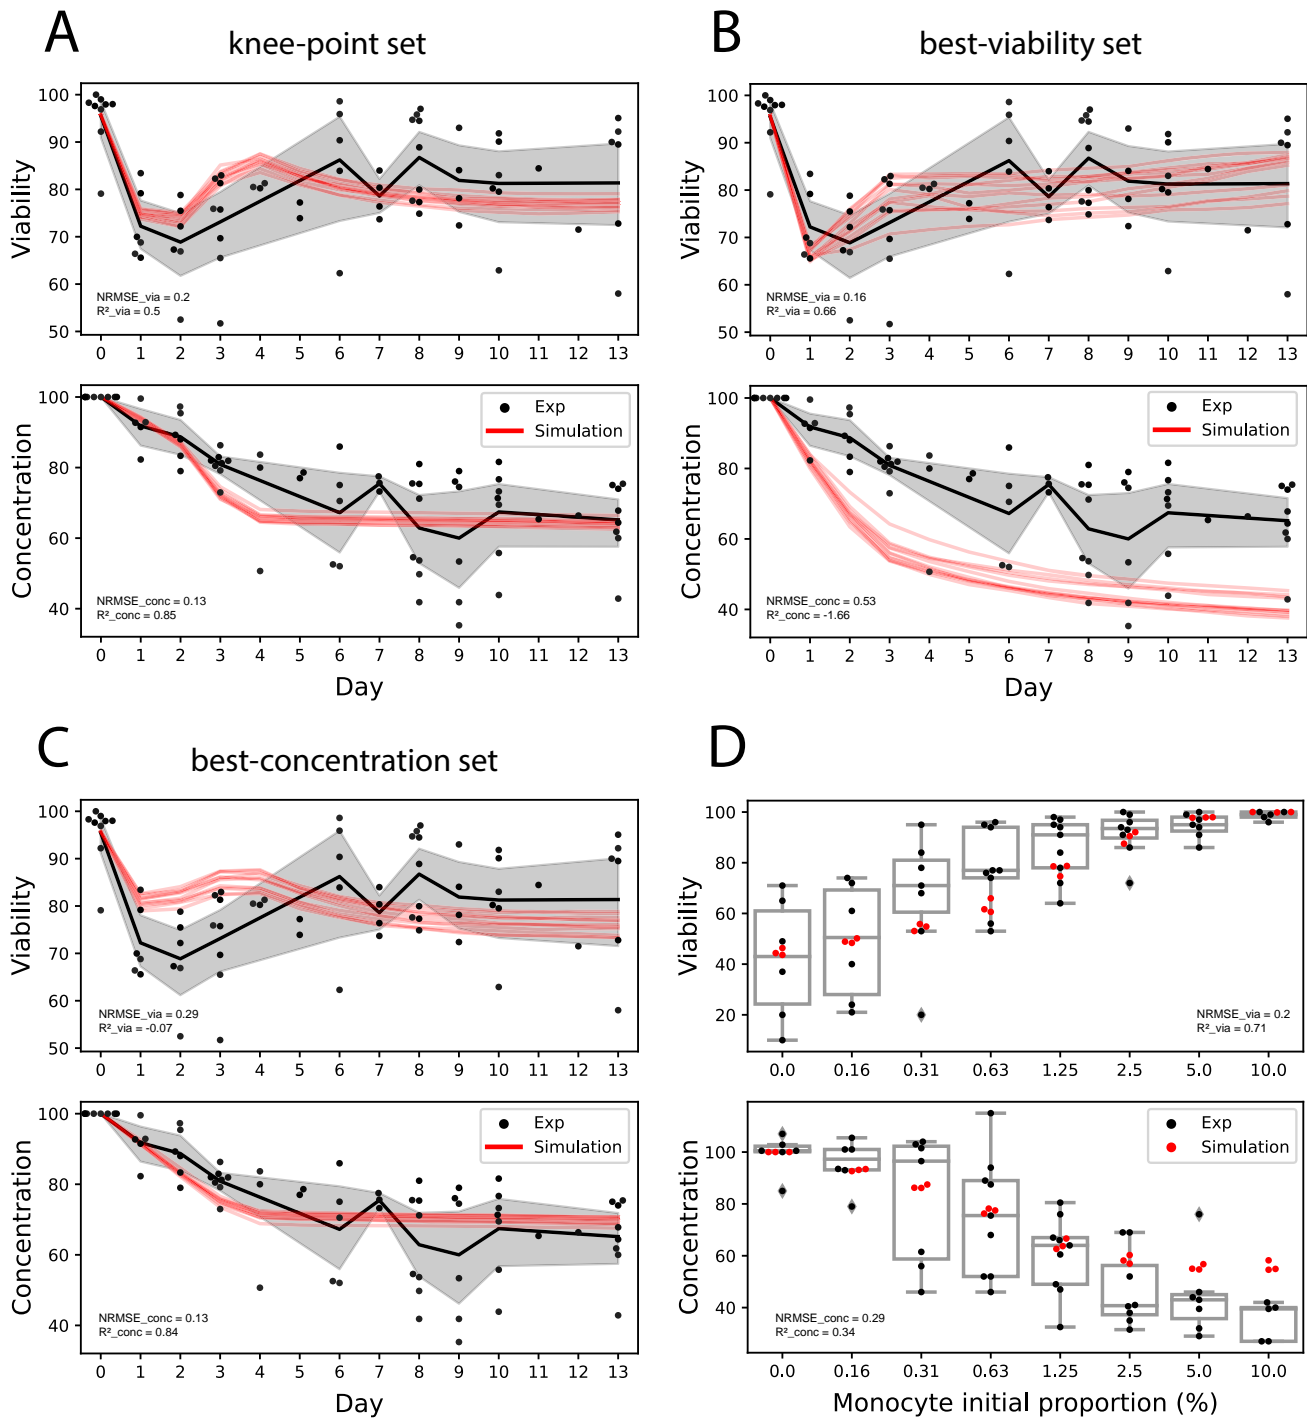

**Fig. 5. Comparison of simulated and experimental results. A, B, C) Model fitting on PBMC autologous cultures.** 12 simulations were run with the knee-point parameter set (A), the parameter set maximizing the viability fitness (B), the parameter set maximizing the concentration fitness (C), and compared with the experimentally observed viability and concentration dynamics averaged over 9 patients. The initial monocyte and apoptotic cancer cell proportions for the simulations were set to the average monocyte and apoptotic cell proportions measured in the patient PBMCs (1.28% and 4.32%, respectively). Simulations are depicted in red and experimental data in black. **D) Model predictions on heterologous co-cultures with varying monocyte initial proportions.** Simulations were run varying initial monocyte proportions (3 repetitions) for 9 days and are here compared to experimental observations in heterologous co-cultures with the corresponding initial conditions after 9 days (average over 10 experiments including 5 CLL patients and 2 healthy donors). Red dots correspond to the simulations and black dots and boxes correspond to the experimental data. Values of  $R^2$  approaching one and values of NRMSE close to zero indicate a good performance of the model.



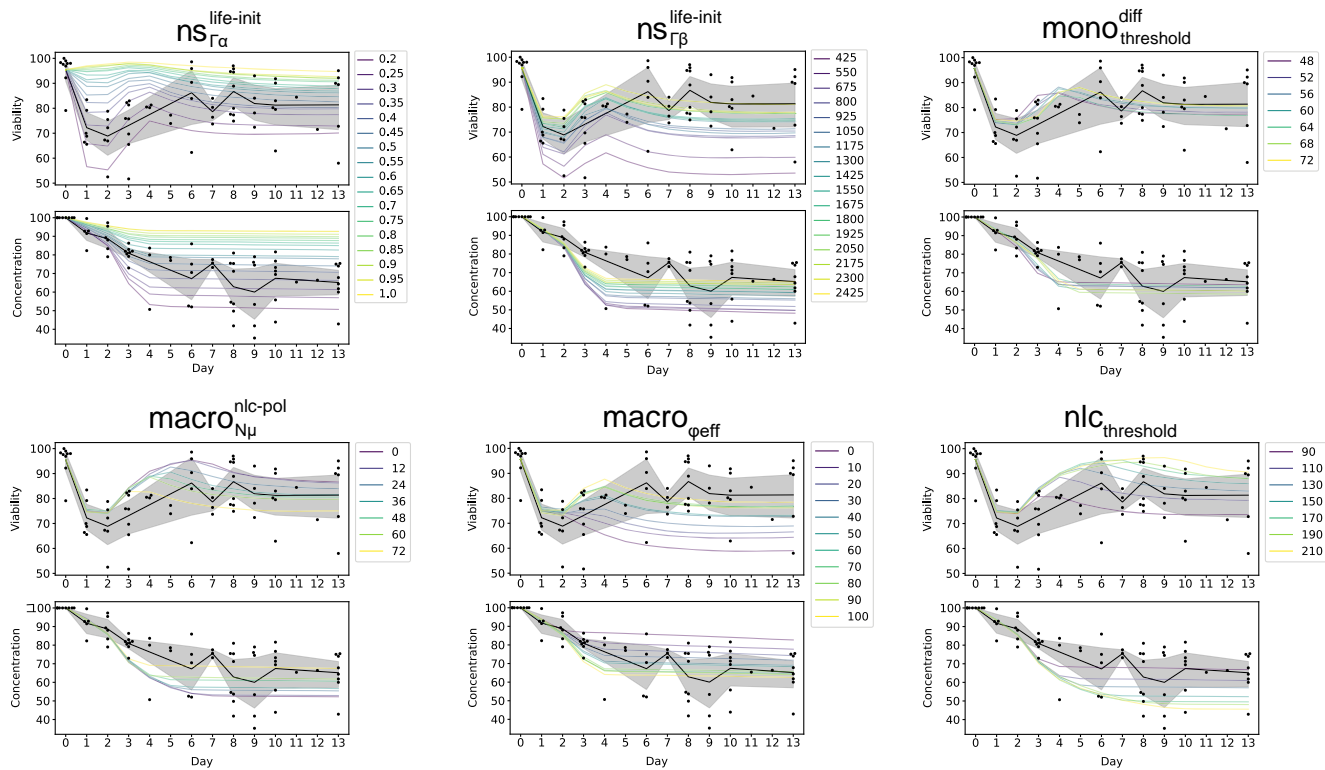

**Fig. 6. Parameter sensitivity analysis.** The parameters were varied one at a time while keeping all other parameters constant to estimate their impact on the overall dynamics (4 simulation runs per value). Parameters which had the largest impact are displayed here (based on having absolute correlation coefficient to fitness on viability or on concentration above 0.4). A parameter sensitivity analysis on the remaining 13 parameters is shown in Fig. S8.

269 major impact on the dynamics, at least with the other parameters fixed to their corresponding values from  
 270 the knee-point parameter set. We then explored the importance of phagocytosis by performing simulations  
 271 varying the characteristic phagocytosis efficiency of macrophages ( $\text{macro}_{\phi_{\text{eff}}}$ ), highlighting the importance  
 272 of this parameter in rescuing CLL cell viability. Finally, we evaluated the importance of the threshold that  
 273 determines after how long a macrophage turns into NLC, finding that it also strongly impacts the readout  
 274 dynamics ( $\text{nlc}_{\text{threshold}}$ ). These particular parameters relate to specific mechanisms in the model that are  
 275 potentially fundamental in reproducing the experimental behaviors.

### 276 Patient-specific models allow identification of patients subgroups matching distinct macrophage profiles.

277 As described previously, the performance of our general model with the knee-point parameter set against  
 278 patient-specific dynamics showed varying accuracy scores depending on the patients (Fig. S7). Given  
 279 the extreme variability between patients (Fig. 1C,D), we decided to perform patient-specific parameter  
 280 optimizations using the initial monocyte and initial apoptotic cell proportions specific to each patient,  
 281 optimizing the fit of simulation results to patient-specific experimental data. Knee-point parameters sets



282 were retained for downstream analysis (Supplementary Table 3) and we tested the performance of each of  
283 the 9 models against the corresponding patient Fig. 7A. We observed overall improved fitness accuracy  
284 scores compared to the ones obtained with the general model, as shown by the NRMSE scores and  $R^2$  scores  
285 (Supplementary Table 4, averaged scores of  $=0.66$  and  $R^2_{\text{via}}=-3.98$  for the general model compared to averaged  
286 scores of  $=0.26$  and  $R^2_{\text{via}}=0.27$  for the patient-specific models; averaged scores of  $=0.37$  and  $R^2_{\text{conc}}=-0.68$  for  
287 the general model compared to averaged scores  $=0.21$  and  $R^2_{\text{conc}}=0.44$  for the patient-specific models). We  
288 also tried to predict behaviors in heterologous co-cultures with varying monocyte initial proportions for 3  
289 patients for whom we had the corresponding data, obtaining relatively good fitness scores (Fig. 7B, Patient  
290 3 (NRMSE<sub>via</sub> = 0.66,  $R^2_{\text{via}} = -1.66$ , NRMSE<sub>conc</sub>=0.24,  $R^2_{\text{conc}}=0.58$ ), Patient 4 (NRMSE<sub>via</sub>=0.22,  $R^2_{\text{via}}=0.66$ ,  
291 NRMSE<sub>conc</sub>=0.29,  $R^2_{\text{conc}}=0.49$ ), Patient 6 (NRMSE<sub>via</sub>=0.29,  $R^2_{\text{via}}=0.4$ , NRMSE<sub>conc</sub>=0.16,  $R^2_{\text{conc}}=0.77$ )).  
292 We are well aware, however, that heterologous co-cultures, with monocytes from healthy donors, behave  
293 differently compared to a fully autologous PBMC culture, limiting our chance of using an autologous-based  
294 model to predict heterologous dynamics.

295 The knee-point parameter values for each patient were then used to perform unsupervised patient clustering,  
296 revealing 2 distinct classes Fig. 8A. A principal component analysis was also performed showing a consistent  
297 separation between the two patient classes Fig. 8B. Analyzing the first principal component, which explains  
298 this separation of the two patient clusters Fig. 8C, highlighted the importance of the following parameters  
299 in defining the two classes: cell sensing distances ( $\text{nlc}_{\text{sd}}$ ,  $\text{mono}_{\text{sd}}$ ), macrophage-to-NLC polarization timing  
300 properties ( $\text{macro}_{\text{N}\mu}^{\text{nlc-pol}}$ ), protective effects of the anti-apoptotic factors secreted by NLCs ( $\text{anti-apo}_{\text{boost}}$ ),  
301 apoptotic CLL cells movement probability ( $\text{apo}_{\text{mp}}$ ), phagocytosis efficiency of *Macrophage* and *NLC* cells  
302 ( $\text{macro}_{\phi\text{eff}}$  and  $\text{nlc}_{\phi\text{eff}}$ ). These results reveal the importance of the spatial aspects as well as phagocytosis  
303 and protective effect of NLCs in determining the viability and concentration dynamics.

304 We further compared the distributions of the parameter values from each group identified by the  
305 unsupervised clustering and principal component analysis (Fig. 8A,B), highlighting some parameters that  
306 could be distinctive between the 2 classes (Fig. 9). In particular, among the parameters which contribute  
307 the most in separating the clusters (Fig. 8C),  $\text{macro}_{\text{N}\mu}^{\text{nlc-pol}}$ , related to the polarization status towards *NLC*  
308 when a *Monocyte* turns into a *Macrophage*, is lower in patients from Class A than patients from Class B.  
309 Combined with a higher  $\text{nlc}_{\text{threshold}}$ , this suggests a slower polarization of macrophages into NLCs in Class

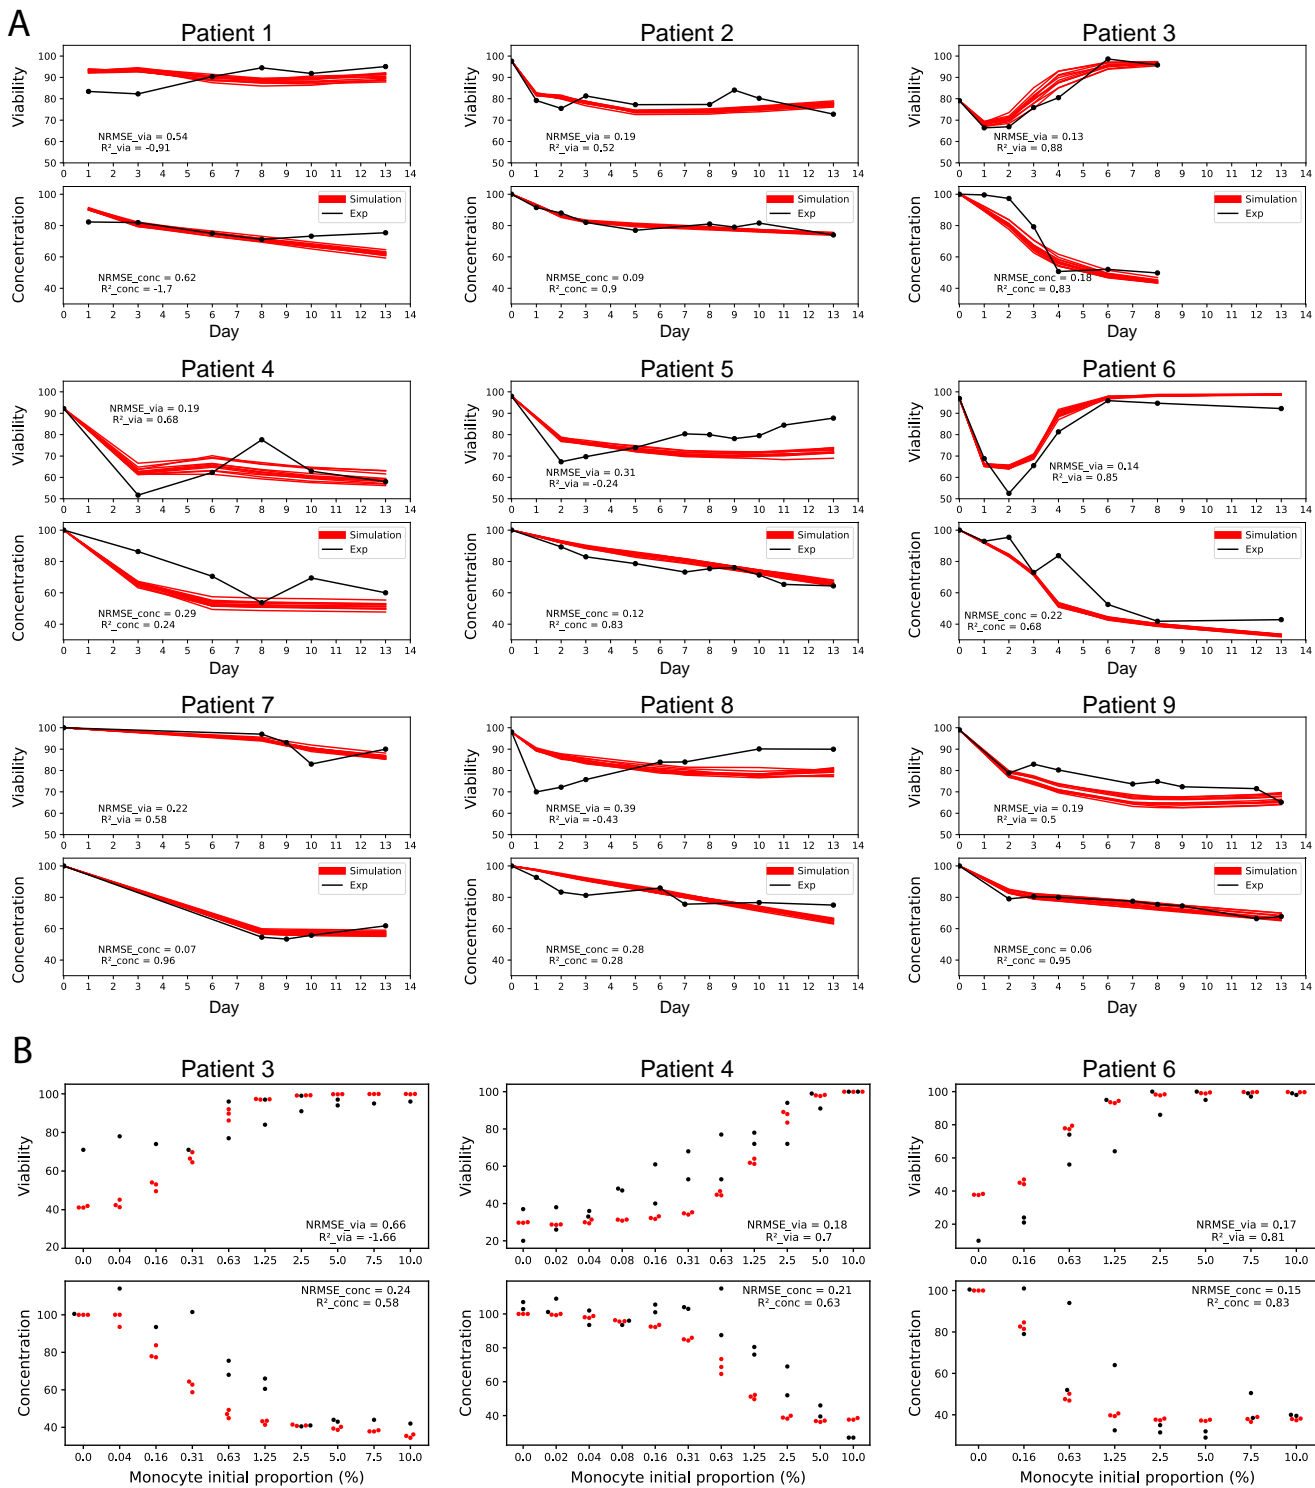

**Fig. 7. Evaluation of the patient-specific models.** **A) Model fitting of patient-specific models on PBMC autologous cultures.** On each panel, 12 simulations are shown with the corresponding patient-specific knee-point parameter set and compared with the experimentally observed viability and concentration dynamics. The initial monocyte proportion for the simulations was set to the corresponding monocyte proportion measured in each patient (Supplementary Table 2). Simulations are depicted in red and experimental data in black. **B) Prediction performances of 3 patient-specific models on heterologous co-cultures with varying monocyte initial proportions.** Simulations were run for varying initial monocyte proportions (3 repetitions) for 9 days and are here compared to experimental observations in heterologous co-cultures with the corresponding initial conditions after 9 days. Red dots correspond to the simulations and black dots correspond to the experimental data. Values of  $R^2$  approaching one and values of NRMSE close to zero indicate a good performance of the model. For each patient, experiments were carried out with varying proportions of monocytes from 2 different healthy donors. However, due to low sample quantities from either the patient and/or the donor, not all monocyte proportions could be tested for all patients. The complete data showing inter-patient and inter-donor variability is available in Supplementary Material (Fig. S3).

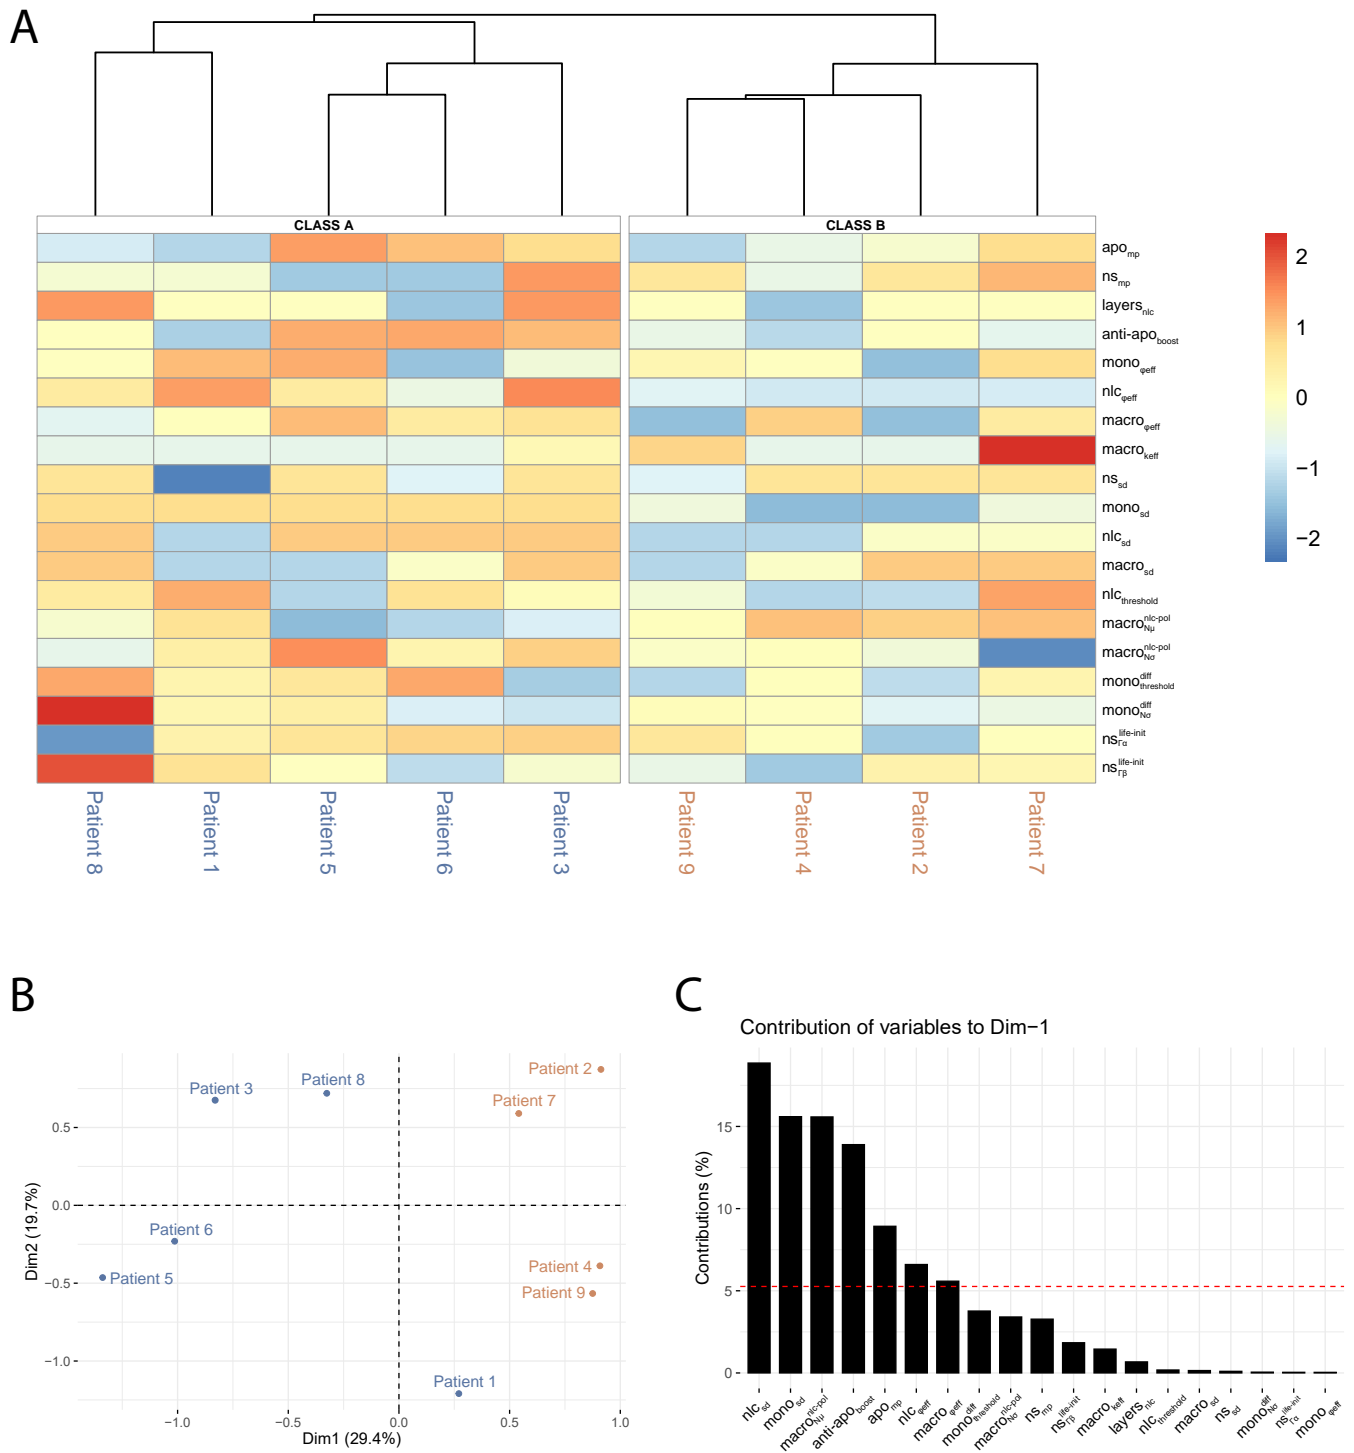

310 A than in Class B patients. Additionally, the parameters  $nlc_{sd}$ ,  $mono_{sd}$ ,  $apo_{mp}$ ,  $nlc_{\phi eff}$ , and  $macro_{\phi eff}$ , are  
 311 all higher in Class A than in Class B patients, suggesting a more efficient overall phagocytosis activity which

312 could induce a quicker clearance of dead and apoptotic cells in Class A patients. Finally,  $\text{anti-apo}_{\text{boost}}$  is  
 313 also higher in Class A, suggesting a better protection against apoptosis from NLCs in patients from this  
 314 class.

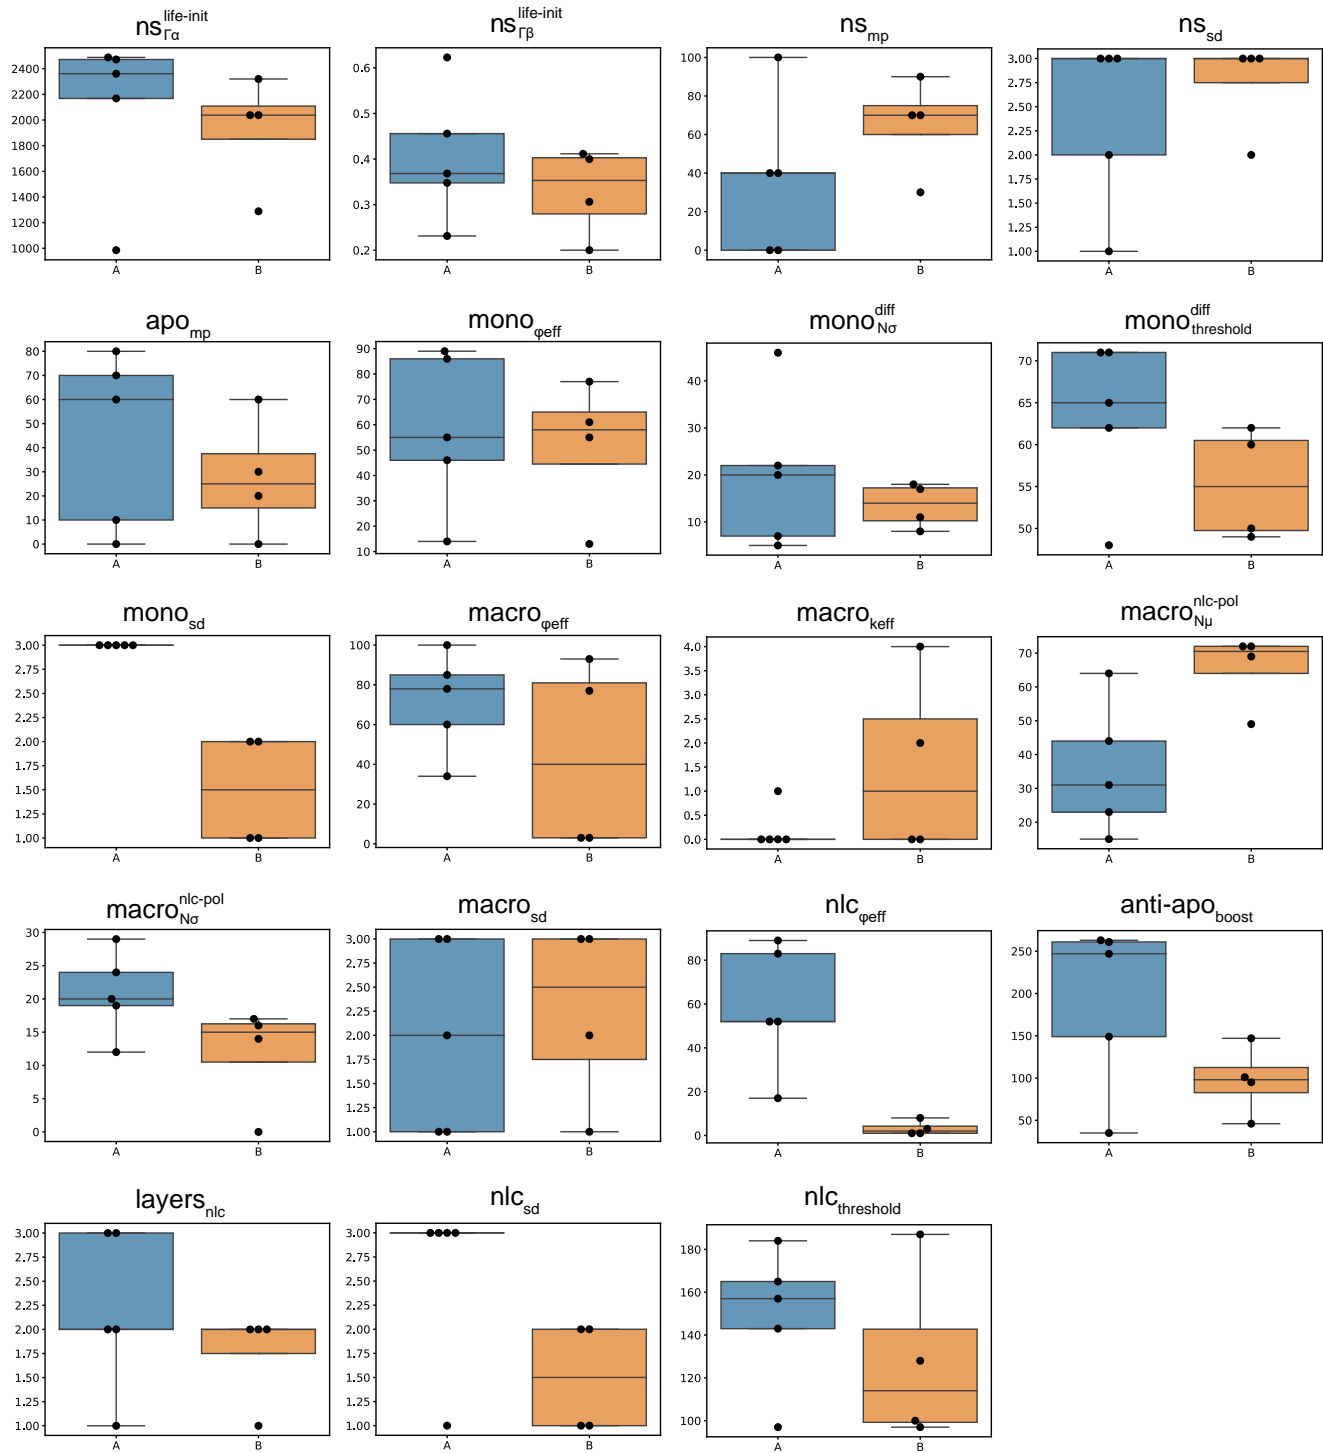

**Fig. 9. Comparative knee-point parameter sets distributions within each patient class.** The knee-point parameter sets of patients from clusters A and B resulting from the unsupervised clustering shown on Fig. 8A were integrated and depicted here in blue for Class A and orange for Class B.

315 Interestingly, some of these findings correlate with patient classes identified experimentally, where patients  
316 with either low or high viability of CLL cells were identified (67). In this publication, we observed a higher  
317 capacity of NLCs to attract leukemic cells and perform phagocytosis in the case of high viability profiles,  
318 possibly corresponding to higher values of the  $layers_{nlc}$  and  $nlc_{\phi_{eff}}$  parameters in Class A than in Class B  
319 patients (Fig. 9). Thus, high-viability patient profiles might correspond to the Class A patients in this  
320 study. We also showed a rescue of CLL cell viability in low-viability profiles when treating the cells with  
321 IL-10, which is known to induce macrophage polarization towards M2-like macrophages. This finding  
322 is in agreement with the hypothesis that patients from Class A here produce a protective NLC class  
323 (M2-like), showing a higher CLL cell viability at the end of the co-culture (Fig. 10), and displaying a  
324 higher *Macrophage* and *NLC* phagocytosis efficiency in our patient-specific models (Fig. 9). The protective  
325 effect of the anti-apoptotic signals secreted by NLCs ( $anti-apo_{boost}$ ) was also found to be higher in Class A,  
326 supporting the fact that this class might correspond to patients producing protective NLCs, secreting more  
327 anti-apoptotic signals than the non-protective NLCs. In both Class A and Class B, we still observed a high  
328 heterogeneity across patients. More samples could allow us to identify subclasses with higher resolution  
329 and better explain this variability.

330 In patients from Class B, the viability of CLL cells is not fully restored during the time course of the  
331 experiment (Fig. 10) suggesting that the NLCs produced are dysfunctional. Interestingly, for two patients  
332 falling in this Class B, macrophages collected from the PBMC autologous culture at Day 8 had a more  
333 M1 rather than an M2 phenotype, supporting the classification of these patients in the non-protective  
334 macrophages class (Patient 2 and 9, Supplementary Table 5). On the other hand, two patients from class A  
335 had macrophages mainly of M2 phenotype, supporting the classification of these patients in the protective  
336 NLC class (Patient 5 and 8, Supplementary Table 5). These findings are consistent with the identification  
337 of a few CLL patients in whom CLL cells polarize macrophages into NLCs that are impaired in their  
338 protective effect on the cancer cells (67).

## 339 Discussion

340 Immunotherapies targeting the TME have proven to be extremely beneficial in a subset of patients. However,  
341 the presence of TAMs in tumors can hinder the efficacy of these treatments and lead to tumor progression  
342 by stimulating proliferation, angiogenesis and metastasis. In this project we aim at understanding how

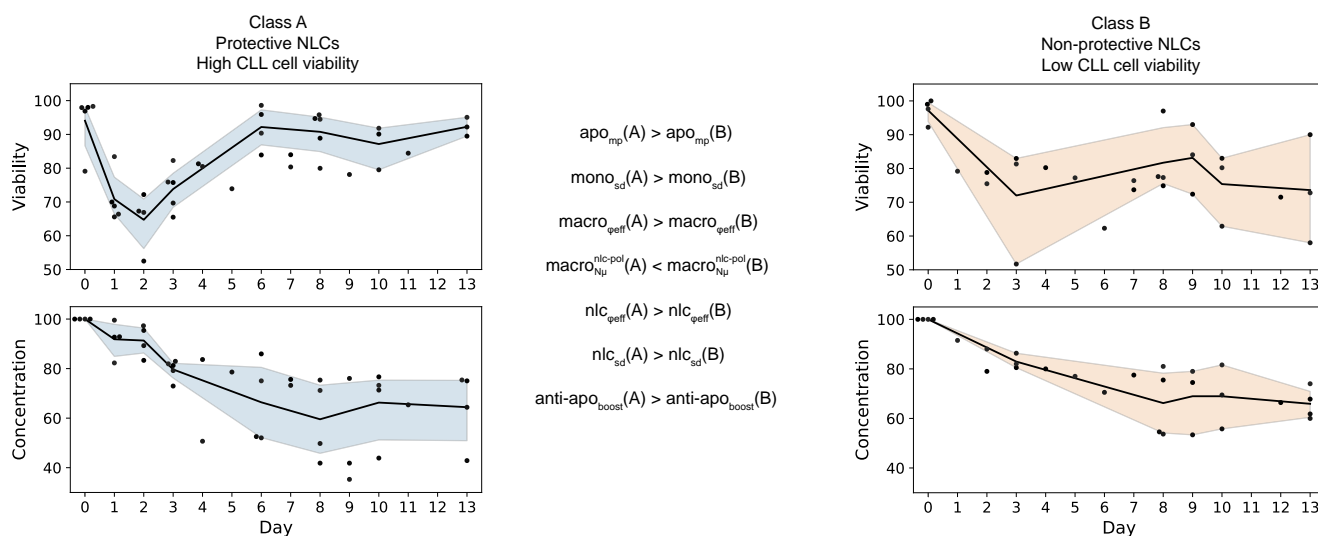

**Fig. 10. Unsupervised patient classification reveals characteristic macrophage profiles.**

343 the pro-tumoral role of TAMs promotes the survival of cancer cells and identifying the cellular processes  
 344 determining this phenomenon. Given the difficulty of studying cellular dynamics in tissues, we turned to an  
 345 *in vitro* model of leukemia, in which we can closely follow the differentiation of TAMs from monocytes in the  
 346 presence of cancer cells. Building on experimental measurements of cell counts and viability of cancer cells  
 347 in cultures of blood from CLL patients, we implemented a two-dimensional ABM to simulate intercellular  
 348 interactions in the spatial context of this *in vitro* culture. More specifically, we modelled the interactions  
 349 between CLL cells and monocytes, and the resulting differentiation of monocytes into macrophages that  
 350 protect cancer cells from spontaneous apoptosis (called NLCs in this pathology). Using our experimental  
 351 observations of cancer cell survival dynamics in autologous PBMC cultures averaged from 9 patients to  
 352 optimize the model parameters, we were able to reproduce biologically realistic dynamics. We further tested  
 353 the predictive power of our model parameterized on averaged patient data in a heterologous experimental  
 354 context, by simulating co-cultures of CLL cells with varying proportions of healthy monocytes, obtaining  
 355 good accuracy between experimental and simulated CLL cell survival readouts at Day 9. These observations  
 356 suggested that our general model could be made patient-specific using routinely measured variables, such  
 357 as the proportion of monocytes in patient's PBMCs. However, when using this input together with patient-  
 358 specific information about the initial proportion of apoptotic cells after CLL cells isolation, we were unable to  
 359 fit each patient's cancer cell survival specific dynamics. We believe that some other patient-specific features  
 360 need to be considered to obtain better predictions. The putative association between initial monocyte

361 proportion in autologous cultures and CLL cell survival or patient outcome remains to be studied clinically,  
362 despite some evidence that monocyte count in CLL patients can be prognostic (68, 69). Heterogeneity  
363 across patients is well known (70) and the formation of NLCs might be extremely patient-specific in both  
364 time scales, numbers, and phenotypes of NLCs generated. We are aware that different dynamics could be at  
365 play in different patients, and we hoped that clinically measurable parameters, such as the initial monocyte  
366 concentration in the blood, could help us produce a generally useful model that can give specific predictions.  
367 However, this involves making strong assumptions about the fact that the same processes are active in  
368 different patients, which remains to be verified. Considering the extreme variability between patients, we  
369 then opted for an approach to identify patient-specific model parameters. As expected, this procedure  
370 allowed us to obtain a much better match with patient-specific experimental data. Furthermore, using  
371 unsupervised clustering methods on the patient-specific parameter values, we detected the existence of 2  
372 distinct classes, which might correspond to protective and non-protective NLCs, as previously suggested  
373 experimentally (67). Additionally, we show that for a subset of patients for which experimental data is  
374 available, this unsupervised classification is consistent with the experimental evidence (cellular markers  
375 measured after 8 days of PBMC autologous cultures), displaying a majority of M2 markers in the case of  
376 the protective macrophages (NLCs), and a majority of M1 markers in the case of the non-protective NLCs.

377 We also analyzed the impact of the model's parameters in fitting the averaged experimental data and  
378 suggest a fundamental role of the heterogeneity of cancer cell life expectancy at initialization, which could  
379 be monitored in further studies by using mono-cultures of patient-derived CLL cells. Results on parameter  
380 correlation to the 2 fitness functions showed an important role for phagocytosis to ensure the long-term  
381 survival of cancer cells in this *in vitro* CLL model. This result was also confirmed by the differences in  
382 parameter distributions between the 2 patient classes corresponding to protective and non-protective NLCs.  
383 These include phagocytosis efficiencies from macrophages and NLCs, their sensing distances of dead and  
384 apoptotic cells and the movement probability of apoptotic cells. These findings suggest that monitoring  
385 and potentially modulating phagocytosis could play a role in the control of TAM formation *in vitro*, in CLL  
386 lymph nodes or even in solid tumors. This hypothesis would be in agreement with the fact that TAM levels  
387 of phagocytosis and efferocytosis affect their functionality and are key to controlling tumor progression  
388 (71, 72). We hypothesize that one possible reason for the importance of phagocytosis in this system lies in



389 the requirement for macrophages to process specific molecules from the cancer cells, such as antigens or  
390 metabolites, in order to induce their polarization into NLCs (71, 73, 74). Although levels of phagocytic  
391 activity in NLCs are still controversial (75, 76), phagocytosis might rely on other cellular interactions with  
392 the cancer cells that would need to be described at the molecular level. Finally, the level of protective  
393 anti-apoptotic signals, that are known to be provided by NLCs to the cancer cells (27), appear to be also  
394 important to differentiate between protective and non-protective NLCs, in agreement with the fact that  
395 protective NLCs secrete more anti-apoptotic signals than non-protective ones.

### 396 **Limitations of the study**

397 There are some important limitations of this study that we will list below. As far as the experiments are  
398 concerned, these *in vitro* cultures do not fully represent what is happening in the patient lymph nodes,  
399 where the density of CLL cells is as high or even higher than what we reproduce in the cultures, but  
400 potentially different cell populations other than cancer cells and monocyte/macrophages can be present in  
401 different proportions, and within a different physical environment. For example, autologous cultures of  
402 PBMCs from CLL patients include small quantities of T cells, NK cells, and traces of other immune cells  
403 (77), whose interactions with NLCs and CLL cells could be important. The effect of these other cells could  
404 not be taken into account in the heterologous cultures that contain exclusively monocyte-derived cells from  
405 healthy donors and cancer cells from CLL patients, rendering the comparisons between the two experiments  
406 difficult. The interactions between cells from different individuals could introduce a cross-reactive immunity,  
407 and we might be introducing effects due to the specific (epi)genetic characteristics of the monocytes from the  
408 healthy donors. Despite all these limitations, the fact that we can predict experimental data of heterologous  
409 co-cultures using the model optimized on autologous CLL patient cultures data suggests that the model  
410 can generalize and capture the overall behavior to some extent. Another important factor that is not taken  
411 into account in this study is the characteristic phenotype of the CLL cells, which are patient-specific and  
412 can be potentially affected by the CLL subtype (unmutated or mutated CLL, i.e. U-CLL, M-CLL (78, 79)),  
413 related to their cell of origin, which can impact the aggressiveness of the disease. Moreover, we cannot  
414 exclude an effect of age or sex of the patient. Due to the reduced number of samples considered, we were  
415 unable to identify any clear association of clinical sample characteristics with the patient classes defined  
416 by the time course profiles and represented by specific model parameters. The limited number of patient

417 samples might also impact the relevance of the results we obtained through our clustering analyses, which  
418 normally require a large number of features and would be more relevant for a larger number of samples.  
419 Further work will be devoted to producing more data to confirm the robustness of our findings on larger  
420 patient cohorts and to experimentally validate the phenotypic state of the CLL cells (living, apoptotic,  
421 necrotic), and myeloid cells (macrophages, NLCs).

422 The computational model also required some assumptions and simplifications which can constitute  
423 limitations. Anti-apoptotic signals were modeled to be secreted by NLCs but it would be interesting to  
424 include the “eat-me” (80) and “don’t-eat-me” signals (CD47) (81, 82) expressed by cancer cells once NLCs  
425 have formed. We also decided to model the system with a two dimensional ABM, since the macrophages  
426 are adherent to the plate and most of the dynamics are determined by what happens on this surface.  
427 However, we observed that cancer cells can form aggregates in 3D, which might impact the overall dynamics  
428 and be indicative of their phenotypic state (83, 84). The initialization of these simulations is currently  
429 stochastic and does not take into account any information that could be extracted from high content  
430 imaging of the cultures. Despite this interesting prospect, the high density of cancer cells in the cultures  
431 has made quantitative imaging particularly difficult, and we will explore these possibilities in further work.  
432 One of the main advantages of ABM is the ease with which spatial information can be integrated. We  
433 therefore plan to expand our experimental setup to be able to capture spatial patterns in a 3D culture that  
434 could be easily compared to those appearing in expanded versions of our simulations. Of note, in some  
435 patients, experimental measurements of concentration show an increase at the very end of the culture. We  
436 could tentatively speculate that this could be explained by a low level of proliferation in the culture. The  
437 environmental change from circulating blood to our static *in vitro* setup could potentially mimic a situation  
438 similar to lymph nodes, in which CLL cells are known to proliferate (58, 59). Our PBMC co-culture system  
439 could allow the appearance of specific molecular signaling interactions and lead to activation of CLL cell  
440 proliferation. However, due to lack of clear biological evidence in our experiments, CLL cell division was not  
441 expected and not implemented in our model. An additional factor that could explain this phenomenon is a  
442 small level of medium evaporation taking place during the time course, artificially provoking an increase of  
443 cell concentration with time. Care was taken in controlling this effect, but some experimental errors or  
444 biases cannot be excluded. These include for example limited sample sizes (n=1 or n=2), variations in

445 the volume samplings or spatial heterogeneity in where the samples were taken, producing noise in the  
446 measured data and leading to a residual impact on the concentration curves.

447 Our model being mostly qualitative, the interpretations we can draw from it can be limited. We were  
448 unable to define a single set of parameters that could be used for all the 9 patients considered, taking  
449 the initial monocyte concentration as an input variable. We can assume that some unexplored patient  
450 characteristics (constant or at the time of sampling) can lead to the production of either protective or  
451 non-protective NLCs and we were able to detect these two patient classes from parameter sets for our  
452 patient-specific models. Collecting data from more patients would allow us to more robustly define these  
453 two classes and might lead to biomarkers that identify patients that are likely to develop resistance to  
454 treatment due to the presence of protective NLCs in their lymph nodes.

455 A possible extension of the usage of our model would be to include the effect of drug treatments, such  
456 as Bruton's tyrosine kinase (BTK) inhibitors which are one of the main molecules used to treat CLL.  
457 In particular, ibrutinib is known to induce pro-apoptotic effects on CLL cells by impairing BCR and  
458  $\text{NF-}\kappa\beta$  signaling. This in turn modifies among others the cancer cell mobility and adherence, limiting their  
459 attraction to the TME which includes NLCs, and finally leading to CLL cell apoptosis (20). Ibrutinib  
460 also indirectly modulates exchanges between CLL cells and NLCs by the inhibition of BTK expressed by  
461 NLCs. Additionally, Ibrutinib was shown to decrease the phagocytic potential of NLCs by downregulation  
462 of MAC1, CD11b, and CD18 expression (85). Clodronate is another promising molecule in treating CLL  
463 patients. It targets both monocytes and M2 macrophages, and was shown to inhibit the formation of  
464 NLCs *in vitro*, leading to an increased mortality of cancer cells and to sensitization to ibrutinib in the case  
465 of resistant cells (86, 87). Finally, IFN- is able to repolarize NLCs into M1-like macrophages, leading to  
466 decreased CLL cell viability and increased antibody-dependent phagocytosis by NLCs (76). Our model  
467 could be used to partially simulate these phenomena at the cellular scale and to suggest new hypotheses  
468 with regards to the mechanisms at play in the resistance to BTK inhibitors. However, combining our  
469 approach with a molecular model of monocyte differentiation into NLCs (25) and of CLL cell internal  
470 processes is crucial to predict the effect of specific treatments in detail and will be subject of further work.

471 Another obvious extension would involve simulating cellular dynamics in tissues, thus tackling the issue of  
472 TAM formation in solid tumors. We have recently developed tools to extract spatial information from tumor

473 tissue samples either imaged via microscopy or characterized through single-cell spatial-omics techniques  
474 (88), and we plan to establish a framework to use spatial data to initialize the ABM simulations in these  
475 more complex contexts. Finally, we realize the importance of internal regulatory processes that determine  
476 the agents' behaviors and plan to extend this model by combining it with gene regulatory network models  
477 of phenotype transitions inside each cell (cancer cells, monocytes and potentially other cells present in the  
478 TME in considerable proportions, such as lymphocytes or fibroblasts). We believe that hybrid approaches  
479 coupling gene regulatory models with agent-based models will be key in improving models' accuracy. In  
480 this direction, we have developed a Boolean model of monocyte differentiation into NLC that we plan to  
481 integrate to the presented ABM using suitable tools in further work (25, 52, 53).

482 To conclude, we hope that this model can be a starting point to provide simulations of dynamic cellular  
483 interactions in the tumor microenvironment, able to take into account patient-specific characteristics, and  
484 useful to generate novel biological hypotheses.

## 485 **Materials and Methods**

486 **Cell culture.** Blood samples were obtained after informed consent and stored at the HIMIP collection.  
487 According to French law, the HIMIP collection was declared to the Ministry of Higher Education and  
488 Research (DC 2008-307 collection 1) and a transfer agreement (AC 2008-129) was agreed after approbation  
489 by the "Comité de Protection des Personnes Sud-Ouest et Outremer II" (ethical committee). Clinical and  
490 biological annotation of samples were declared to the Comité National Informatique et Libertés (CNIL;  
491 data processing and liberties national committee).

492 We used two different *in vitro* co-culture systems which we monitored through cell counting by hemocy-  
493 tometer and FACS analysis at different time points. In the first experimental system referred to as "PBMC  
494 autologous cultures", CLL Peripheral Blood Mononuclear Cells (PBMC) were isolated from patients' blood  
495 and were directly cultured *in vitro*. PBMC are composed of cancerous CLL cells and include around 1%  
496 of monocytes and traces of other immune cells, including lymphocytes (1-5% of T, B and NK cells). In  
497 the second experimental system referred to as "heterologous co-cultures", CLL cells were isolated from  
498 CLL patients' PBMC and mixed with varying concentrations of monocytes purified from healthy donors to  
499 assess the relationship between the initial density of healthy donor monocytes and the level or survival of  
500 cancer cells after 9 days of co-culture, with and without NLC formation (i.e. with and without monocytes

501 in the co-culture).

502 • **PBMC autologous cultures.** To generate autologous NLCs, PBMC were isolated from the blood of  
503 CLL patients and were cultured at  $10^7$  cells/mL in RPMI 1640 supplemented with 10% Fetal Bovine  
504 Serum (FBS) and and 1% Penicillin/Streptomycin (Gibco) in the incubator at 37°C with 5% CO<sub>2</sub>.  
505 Cells were cultured for 13 days during which differentiation of the NLCs was followed by bright field  
506 imaging microscopy and phenotype of the cells was assessed by flow cytometry (presence of CD14,  
507 CD163 and CD206) at the final day of the culture. CLL cell samples were taken every day (or every 2  
508 or 3 days, depending on the patient) to measure the remaining cell concentration by hemocytometer  
509 and cell viability by flow cytometry using AnnexinV/7-AAD staining.

510 • **Heterologous co-cultures.** To generate heterologous co-culture, CLL cells from PBMC fraction  
511 were isolated using negative selection (EasySep™ Human B Cell Enrichment Kit II Without CD43  
512 Depletion, STEMcell) and monocytes from healthy donors' PBMC were isolated using positive  
513 selection method (CD14 MicroBeads, human, Miltneyi). Subsequently CLL cells at  $10^7$  cells/mL were  
514 mixed with varying concentrations of purified monocytes. At Day 9 concentration and viability of the  
515 CLL cells was measured and the phenotype of NLCs was assessed by FACS. CLL PBMC used for the  
516 autologous co-cultures contained >85% of CLL cells and 0.21-3.48% of monocytes as assessed by flow  
517 cytometry. Purity of the isolated CLL cells and monocytes exceeded 95%.

518 **Flow cytometry.** Follow-up of monocyte-to-NLC differentiation was performed by analysis of changes in  
519 the expression of myeloid cell markers by flow cytometry. Briefly, at different time points, autologous CLL  
520 patient's PBMC were gathered from 1 well of 6-well plate. In order to remove adherent macrophages, the  
521 cells were washed twice with PBS, covered with 1 mL of Versene solution and incubated for 30 min at 4°C.  
522 Afterwards 0.5 mL of FBS was added and cells were further detached with gentle scraping (Sarstedt). Both  
523 floating and adherent cell fractions were combined, washed in PBS and re-suspended in flow cytometry  
524 buffer (PBS + 2% FBS) containing Human BD Fc Block™ (2.5μ g/mL) and incubated for 15 min at 4°C.  
525 Subsequently cells were stained with CD14, CD16, CD163 and CD206 antibodies (BD Pharmingen) at  
526 saturating concentrations and incubated for 20 min at 4°C. After washing, samples were resuspended in  
527 PBS and analyzed by LSRII flow cytometer (BD Biosciences). Results were further processed using Flow  
528 Logic 700.2A (Inivai Technologies Pty. Ltd) software.

529 **Agent Based Model.** At each time step, 3 main processes are executed by each cell: update-position,  
530 update-properties and update-class. Movements concern all cells except the *Dead* ones, which are immobile.  
531 Cell motility can either be random or directional, for example when the *NeedSignal* cancer cells move towards  
532 *NLCs*, or when the phagocytic myeloid cells move towards *Apoptotic* or *Dead* cancer cells. Phagocytosis is  
533 modeled as an active search by the myeloid cells towards *Dead* and *Apoptotic* cancer cells. If the myeloid  
534 cell encounters a *Dead* and *Apoptotic* cancer cell within its characteristic perception radius (i.e. sensing  
535 distance), it will phagocytose it with its characteristic probability (i.e. phagocytosis efficiency), and the  
536 phagocytosed cancer cell will be cleared from the simulation. In the reverse case, the myeloid cell will  
537 move to a random surrounding patch. Properties updates concern the cancer cells `life` property, the  
538 `differentiation` status of *Monocytes* into *Macrophages*, the `nlc-polarization` status of *Macrophages*  
539 into *NLCs* and the amount of anti-apoptotic signals which are present on each patch. At each time step,  
540 agents can change their class based on the comparison of their property values and specific calibrated  
541 thresholds. For example, *NeedSignal* cancer cells will turn into *Apoptotic* cells if their `life` property value  
542 goes below the apoptosis threshold. *Apoptotic* cancer cells will convert to *Dead* if their `life` property value  
543 goes below the death threshold. Myeloid cells will differentiate from *Monocyte* to *Macrophage* depending  
544 on their `differentiation` status compared to the differentiation threshold. *Macrophages* will polarize into  
545 *NLCs*, depending on their `nlc-polarization` status compared to the NLC threshold.

546 The UML class diagrams shown on Fig. S4 display in detail every action performed by each agent class:

- 547 • ***Monocytes*** can perform 3 actions: move, perform phagocytosis and differentiate into *Macrophages*.  
548 *Monocytes* can move towards *Apoptotic* or *Dead* CLL cells in their perception radius ( $\text{mono}_{\text{sd}}$ ), and  
549 will phagocytose these cells with a specific probability ( $\text{mono}_{\phi_{\text{eff}}}$ ). If they cannot find any *Dead* or  
550 *Apoptotic* cancer cell, they will move randomly. At the beginning of the simulation, *Monocytes* start  
551 to adhere progressively to the substrate (`differentiation` property increments by 1 at each time  
552 step) and will differentiate into *Macrophages* after 2 to 3 days ( $\text{mono}_{\text{threshold}}^{\text{diff}}$ ).
- 553 • ***Macrophages*** can perform 4 actions: move, perform phagocytosis, polarize into NLCs and kill the  
554 *NeedSignal* cancer cells. Similarly to *Monocytes*, *Macrophages* can move towards *Apoptotic* or *Dead* cells  
555 in their perception radius ( $\text{macro}_{\text{sd}}$ ) and phagocytose them with their specific probability ( $\text{macro}_{\phi_{\text{eff}}}$ ).  
556 If they cannot find any *Dead* or *Apoptotic* cancer cell, they will move randomly. *Macrophages* are

557 also able to directly kill *NeedSignal* CLL cells with a low characteristic probability between 0% and  
558 5% ( $\text{macro}_{\text{keff}}$ ). At each time step, their **nlc-polarization** property will increase by 1 if they are  
559 located next to a *NeedSignal* or *Apoptotic* cancer cell, and will decrease by 1 in the reverse case. The  
560 complete polarization into *NLC* will occur when the *Macrophages* have been in contact with cancer  
561 cells for a sufficient duration ( $\text{nlc}_{\text{threshold}}$ ). Thus,  $\text{nlc}_{\text{threshold}}$  can be seen as a proxy for the number  
562 of accumulated hours for which a *Macrophage* has been in contact with at least one *NeedSignal* or  
563 *Apoptotic* cancer cell.

564 • **NLCs** can perform 3 actions: move, perform phagocytosis and secrete anti-apoptotic signals on  
565 patches. Similar to *Macrophages*, *NLCs* will move in the direction of *Apoptotic* or *Dead* CLL cells  
566 in their perception radius ( $\text{nlc}_{\text{sd}}$ ), and will phagocytose them with their characteristic probability  
567 ( $\text{nlc}_{\phi\text{eff}}$ ). If they cannot find any *Dead* or *Apoptotic* cancer cell, they will move randomly. At each time  
568 step, if they are located next to a *NeedSignal* cancer cell, *NLCs* will secrete 1 unit of anti-apoptotic  
569 signals on the patch they are located on. If they are not surrounded by any *NeedSignal* cancer cell,  
570 they will decrease their **nlc-polarization** property by 1.

571 • ***NeedSignal*** cancer cells can perform 3 actions: move, decrease their **life** property value (default  
572 behavior) or increase their **life** property value (through anti-apoptotic signals). Cancer cell movement  
573 involves actively searching for *NLCs* around them in a characteristic perception radius ( $\text{ns}_{\text{sd}}$ ) and  
574 a characteristic movement probability ( $\text{ns}_{\text{mp}}$ ). If a *NLC* is located in its perception radius, the  
575 *NeedSignal* cancer cell will move towards it, or randomly in the reverse case. Importantly, when  
576 a *NeedSignal* cancer cell finds a *NLC*, it will remain attached to it on  $n$  layers (with  $n$  being the  
577 number of layers of cancer cells that *NLCs* can have around them, corresponding to the parameter  
578  $\text{layers}_{\text{nlc}}$ ). This process can greatly impact how the *NLCs* will move and perform phagocytosis, due  
579 to the inherent relationship between  $\text{layers}_{\text{nlc}}$  and  $\text{nlc}_{\text{sd}}$ . By default, a *NeedSignal* cancer cell will  
580 have its **life** property value decrease by 1 unit at each time step. However, if the cancer cell is  
581 located on a patch containing more than 1 unit of anti-apoptotic signal, it will consume 1 unit of  
582 the anti-apoptotic signal and get an increment of  $\text{anti-apo}_{\text{boost}}$  on its **life** property value, helping it  
583 fight apoptosis and survive overall longer. The *NeedSignal* cell **life** property represents the number  
584 of hours it can remain in the *NeedSignal* state before reaching the apoptosis threshold ( $\text{apo}_{\text{threshold}}$ ).



585 The apoptosis threshold is set to 0 since it represents a threshold below which the cancer cells enter  
586 an irreversible apoptotic state from which they cannot be rescued. *NeedSignal* cancer cells cannot be  
587 phagocytosed but they can be killed by *Macrophages*.

588 • **Apoptotic** cancer cells can perform 2 actions: move and decrease their **life** property value. *Apoptotic*  
589 cancer cells move randomly with their characteristic movement probably ( $\text{apo}_{\text{mp}}$ ). This movement  
590 probability will impact the overall phagocytosis efficacy since it affects the possible encounters between  
591 *Apoptotic* cells and phagocytic cells. In the irreversible *Apoptotic* state, cancer cells can no longer  
592 benefit from the anti-apoptotic signals from NLCs and will subsequently die, following a decrement  
593 of their **life** property by 1 at each time step until they reach the death threshold ( $\text{death}_{\text{threshold}}$ ),  
594 which is set to -500 hours based on timings observed on CLL cell monocultures. *Apoptotic* cancer  
595 cells can be phagocytosed by *Macrophages* or *NLCs*.

596 • **Dead** cancer cells can perform 1 action: decrease their **life** property value. In this state, cancer  
597 cells can no longer move and can only be phagocytosed.

598 • **Patches** can perform 1 action: update their amount of anti-apoptotic signals. At each time step, if  
599 a *NLC* is located on a given patch and is located next to a *NeedSignal* cancer cell, the amount of  
600 anti-apoptotic signals on this patch will increase by 1. In absence of any *NLC*, and if some amount  
601 of anti-apoptotic signals is already present on the Patch, the total amount will decrease by 0.1% of  
602 its actual value (arbitrarily set to a negligible decrease in this model). This is inspired by cytokine  
603 diffusion processes (89, 90) that will impact the 8 neighboring patches which will thus receive 1/8 of  
604 0.1% of the chemical.

605 **Stochasticity.** In this model, stochasticity is used to describe cell motility and heterogeneity of property  
606 values in the cell population at initialization. The stochastic aspect in cell motility consists in randomly  
607 chosen moving directions when performing different actions (move, phagocytose), whereas cell heterogeneity  
608 consists in probabilistic distributions at instantiation of the different cell types. In this way, the model  
609 provides cells of the same type to be asynchronous to a certain action. The corresponding parameters were  
610 explored within empirically chosen ranges and optimized through the genetic algorithm to fit the viability  
611 and concentration dynamics observed experimentally. More specifically:

- 612 • **Monocytes.** The cells are initialized with a property value of `differentiation` taken from a normal  
613 distribution  $N(0, \text{mono}_{N\sigma}^{\text{diff}})$ . The differentiation time required for *Monocytes* to differentiate into  
614 *Macrophages* is  $\text{mono}_{\text{threshold}}^{\text{diff}}$
- 615 • **Macrophages.** The cells are instantiated with a property value of *NLC-polarization* taken from a  
616 normal distribution  $N(\text{macro}_{N\mu}^{\text{nlc-pol}}, \text{macro}_{N\sigma}^{\text{nlc-pol}})$  with the mean of the distribution corresponding to  
617 the time when the first NLCs should be observed experimentally.
- 618 • **NeedSignal cancer cells.** The cells are initialized with various values of `life` property value taken  
619 from a Gamma distribution  $\Gamma(x, \text{ns}_{\Gamma\alpha}^{\text{life-init}}, \text{ns}_{\Gamma\beta}^{\text{life-init}})$ , with  $\text{ns}_{\Gamma\alpha}^{\text{life-init}}$  being the shape and  $\text{ns}_{\Gamma\beta}^{\text{life-init}}$  the  
620 rate of the distribution.
- 621 • **Density of the world.** Considering the surface available for the cells in the culture wells (12-well  
622 plates, with a planar surface of  $3.5\text{cm}^2$  in each well), a diameter of  $5\mu\text{m}$  for the CLL cells, a seeding  
623 concentration of  $10^7$  cells/mL and assuming a spherical shape of the cells, we estimated the surface  
624 cell density to be around 55% (ratio of the surface occupied by the CLL cells to the total surface of  
625 the well).

626 **Parameter optimization.** Variables related to cell density, initial monocyte proportions, the time-scales and  
627 heterogeneity of monocyte-to-macrophage differentiation, NLC formation and CLL cell apoptosis duration  
628 were estimated or calibrated based on *in vitro* PBMC autologous cultures experimental data. The model  
629 involves 19 parameters for which optimization with the NSGA-II genetic algorithm was performed to infer  
630 their values (Supplementary Table 1). Most of the model parameters (such as the sensing distances, the NLC  
631 polarization, the protective effects of the anti-apoptotic signals, or the NLC threshold) are associated with  
632 the modeling procedure and do not necessarily have an exact measurable biological or physical counterpart,  
633 nor a real-world unit value. Therefore, parameter values should not be taken as absolute but rather as  
634 representative for the process they encode. Parameter ranges able to reproduce the observed experimental  
635 dynamics were selected and parameters were systematically in these empirically determined ranges.

636 We derived 2 objective functions from experimental results obtained from *in vitro* co-cultures of monocytes  
637 and CLL cells, corresponding to two main readouts: cell viability (i.e, the ratio of initial CLL cell number  
638 minus dead cell number to the initial CLL cell number) and cell concentration (expressed as the ratio of total

639 CLL cell number to the initial CLL cell number). We defined the cost functions as the least square errors  
640 between the model predictions and the available experimental time-points on cell viability and concentration.  
641 Dealing with incomplete datasets, we considered only the time points in which the measurements were  
642 available for at least 4 patients. The OpenMOLE (Open MOdeL Experiment) software was used to  
643 perform 20'000 simulations exploring specific ranges of each of the 19 parameters (Supplementary Table 1).  
644 OpenMOLE is a platform used to perform large-scale user-supplied model exploration, calibration, machine  
645 learning, optimization and data processing (56). In general, these procedures demand high computational  
646 time and power; for this reason OpenMOLE uses a DSL (Domain Specific Language) for distributed  
647 model exploration written in Scala. In this platform, the model calibration was automated with a genetic  
648 algorithm (NSGA-II) on the 2 objective functions. To initialize the genetic algorithm in OpenMOLE,  
649 default values were chosen, i.e. random values of initial population, mutation probability and crossover  
650 probability. The genetic algorithm convergence is ensured by using a Pareto converging algorithm (Fig.  
651 3B), which naturally samples the explored space and ensures that the population advances towards the  
652 Pareto front, thus choosing heuristically sets of parameters (91).

653 The optimization outputs generated by OpenMOLE were further analyzed, in order to select the set of  
654 parameters with the best fit and prediction power. Firstly, to ensure robustness, the optimization outputs  
655 were filtered to select only the sets of parameters which have been repeatedly simulated at least 50 times  
656 along the optimization process. The sets of parameters fulfilling this condition were represented in the form  
657 of a Pareto front (Fig. 3B). Secondly, we ranked the sets of parameters according to their fitness on viability  
658 and concentration in order to choose the best set of parameters for further model analysis. Since the two  
659 fitnesses were anti-correlated, curve fitting was performed using 3 specific parameter sets: (i) one with the  
660 best fitness on viability, (ii) a second one with the best fitness on concentration and (iii) a third one located  
661 at the knee-point on the Pareto front. We observed that the set corresponding to the knee-point produces  
662 the most similar viability and concentration dynamics to those observed experimentally (Fig. 5A), as  
663 confirmed by the  $R^2$  and NRMSE values. Figures 5B and 5C show the simulation results using models with  
664 parameters from the sets of best fitness on viability and concentration dynamics. For computational reasons,  
665 parameter exploration was performed on 1000 cells, whereas the validation simulations were performed on  
666 5000 cells, to underscore the scale-invariant results of our study.

667 **Code availability.** All the files used for model simulation in Netlogo, parameter optimization in Open-  
668 MOLE and statistical analysis of the outputs are available in GitHub: [https://github.com/VeraPancaldiLab/](https://github.com/VeraPancaldiLab/Agent-Based-Model-of-NLC-in-CLL)  
669 **Agent-Based-Model-of-NLC-in-CLL**. The NetLogo model can also be run online on NetLogoWeb at  
670 <https://www.netlogoweb.org/>.

671 **Authors Contribution.** Conceptualization, N.V. and V.P.; model design and computational framework, N.V.  
672 and H.A.; computational methodology, N.V. and H.A.; Simulations, N.V.; Data processing, N.V. and M.M.;  
673 Experimental data generation, M.D. and J.B.; original draft preparation, N.V., M.M. and V.P.; review and  
674 editing, M.P. M.D.; patient resources, L.Y.; Supervision of the work, M.P. and V.P.

675 **ACKNOWLEDGMENTS.** We wish to thank the patients and donors who donated blood samples to this study.  
676 This work was funded by the Fondation Toulouse Cancer Santé and by the Pierre Fabre Research Institute as part  
677 of the Chair of Bioinformatics in Oncology of the CRCT.

- 678 1. Manpreet Sambi, Leila Bagheri, and Myron R Szewczuk. Current challenges in cancer immunotherapy: multimodal approaches to improve efficacy and patient response rates. *Journal of oncology*,  
679 2019, 2019.
- 680 2. Lisa M Coussens and Zena Werb. Inflammation and cancer. *Nature*, 420(6917):860–867, 2002.
- 681 3. Roy Noy and Jeffrey W Pollard. Tumor-associated macrophages: from mechanisms to therapy. *Immunity*, 41(1):49–61, 2014.
- 682 4. Slava Epelman, Kory J Lavine, and Gwendalyn J Randolph. Origin and functions of tissue macrophages. *Immunity*, 41(1):21–35, 2014.
- 683 5. Alessandro Palma, Abdul Salam Jarrah, Paolo Tieri, Gianni Cesareni, and Filippo Castiglione. Gene regulatory network modeling of macrophage differentiation corroborates the continuum hypothesis  
684 of polarization states. *Frontiers in physiology*, 9:1659, 2018.
- 685 6. Fernando O Martínez and Siamon Gordon. The m1 and m2 paradigm of macrophage activation: time for reassessment. *F1000prime reports*, 6, 2014.
- 686 7. Jia Xue, Susanne V Schmidt, Jil Sander, Astrid Draffehn, Wolfgang Krebs, Inga Quester, Dominic De Nardo, Trupti D Gohel, Martina Ernde, Lisa Schmidleithner, et al. Transcriptome-based network  
687 analysis reveals a spectrum model of human macrophage activation. *Immunity*, 40(2):274–288, 2014.
- 688 8. Shweta Aras and M Raza Zaidi. Tameless traitors: macrophages in cancer progression and metastasis. *British journal of cancer*, 117(11):1583–1591, 2017.
- 689 9. Alberto Mantovani, Paola Allavena, and Antonio Sica. Tumour-associated macrophages as a prototypic type ii polarised phagocyte population: role in tumour progression. *European journal of cancer*,  
690 40(11):1660–1667, 2004.
- 691 10. L. Bingle, N. J. Brown, and C. E. Lewis. The role of tumour-associated macrophages in tumour progression: Implications for new anticancer therapies. *Journal of Pathology*, 196(3):254–265, 2002. .
- 692 11. Luca Cassetta and Jeffrey W Pollard. Targeting macrophages: Therapeutic approaches in cancer, Nov 2018. ISSN 14741784. URL <https://www.nature.com/articles/nrd.2018.169>.
- 693 12. Maurilio Ponzoni, Claudio Dogliani, and Federico Caligaris-Cappio. Chronic lymphocytic leukemia: the pathologist's view of lymph node microenvironment. In *Seminars in diagnostic pathology*,  
694 volume 28, pages 161–166. Elsevier, 2011.
- 695 13. Jan A Burger. Nurture versus nature: the microenvironment in chronic lymphocytic leukemia. *Hematology 2010, the American Society of Hematology Education Program Book*, 2011(1):96–103, 2011.
- 696 14. Rachel E Hayden, Guy Pratt, Claudia Roberts, Mark T Drayson, and Chris M Bunce. Treatment of chronic lymphocytic leukemia requires targeting of the protective lymph node environment with novel  
697 therapeutic approaches. *Leukemia & lymphoma*, 53(4):537–549, 2012.
- 698 15. Yair Herishanu, Patricia Pérez-Galán, Delong Liu, Angélique Biancotto, Stefania Pittaluga, Berengere Vire, Federica Gibellini, Ndegwa Njuguna, Elinor Lee, Lawrence Stennett, et al. The lymph node  
699 microenvironment promotes b-cell receptor signaling, nf- $\kappa$ b activation, and tumor proliferation in chronic lymphocytic leukemia. *Blood, The Journal of the American Society of Hematology*, 117(2):  
700 563–574, 2011.
- 701 16. Agata A Filip, Bogumila Ciseł, Dorota Koczkodaj, Ewa Wąsik-Szczepanek, Tomasz Piersiak, and Anna Dmoszyńska. Circulating microenvironment of cl: are nurse-like cells related to tumor-associated  
702 macrophages? *Blood Cells, Molecules, and Diseases*, 50(4):263–270, 2013.
- 703 17. Rebecka Svanberg, Sine Janum, Piers EM Patten, Alan G Ramsay, and Carsten U Niemann. Targeting the tumor microenvironment in chronic lymphocytic leukemia. *haematologica*, 106(9):2312,  
704 2021.

- 705 18. Stefania Fiorcari, Rossana Maffei, Claudio Giacinto Atene, Leonardo Potenza, Mario Luppi, and Roberto Marasca. Nurse-like cells and chronic lymphocytic leukemia b cells: A mutualistic crosstalk  
706 inside tissue microenvironments. *Cells*, 10(2):217, 2021.
- 707 19. Agata A Filip, Bogumila Cisel, and Ewa Wąsik-Szczepek. Guilty bystanders: nurse-like cells as a model of microenvironmental support for leukemic lymphocytes. *Clinical and experimental  
708 medicine*, 15(1):73–83, 2015.
- 709 20. Thomas J Kipps, Freda K Stevenson, Catherine J Wu, Carlo M Croce, Graham Packham, William G Wierda, Susan O'Brien, John Gribben, and Kanti Rai. Chronic lymphocytic leukaemia. *Nature  
710 reviews Disease primers*, 3(1):1–22, 2017.
- 711 21. Jan A Burger, Nobuhiro Tsukada, Meike Burger, Nathan J Zvaifler, Marie Dell'Aquila, and Thomas J Kipps. Blood-derived nurse-like cells protect chronic lymphocytic leukemia b cells from spontaneous  
712 apoptosis through stromal cell-derived factor-1. *Blood, The Journal of the American Society of Hematology*, 96(8):2655–2663, 2000.
- 713 22. Carlo Calissano, Rajendra N Damle, Sonia Marsilio, Xiao-Jie Yan, Sophia Yancopoulos, Gregory Hayes, Claire Emson, Elizabeth J Murphy, Marc K Hellerstein, Cristina Sison, et al. Intracloal  
714 complexity in chronic lymphocytic leukemia: fractions enriched in recently born/divided and older/quiescent cells. *Molecular Medicine*, 17(11):1374–1382, 2011.
- 715 23. F Boissard, JJ Fournie, A Quillet-Mary, L Ysebaert, and M Poupot. Nurse-like cells mediate ibrutinib resistance in chronic lymphocytic leukemia patients. *Blood cancer journal*, 5(10):e355–e355, 2015.
- 716 24. Elisa Ten Hacken and Jan A Burger. Microenvironment interactions and b-cell receptor signaling in chronic lymphocytic leukemia: Implications for disease pathogenesis and treatment. *Biochimica et  
717 Biophysica Acta (BBA)-Molecular Cell Research*, 1863(3):401–413, 2016.
- 718 25. Malvina Marku, Nina Verstraete, Flavien Raynal, Miguel Madrid-Mencia, Marcin Domagala, Jean-Jacques Fournié, Loïc Ysebaert, Mary Poupot, and Vera Pancaldi. Insights on tam formation from a  
719 boolean model of macrophage polarization based on in vitro studies. *Cancers*, 12(12):3664, 2020.
- 720 26. Li Jia, Andrew Clear, Feng-Ting Liu, Janet Matthews, Nadiha Uddin, Aine McCarthy, Elena Hoxha, Catherine Durance, Sameena Iqbal, and John G Gribben. Extracellular hmgb1 promotes  
721 differentiation of nurse-like cells in chronic lymphocytic leukemia. *Blood, The Journal of the American Society of Hematology*, 123(11):1709–1719, 2014.
- 722 27. F Boissard, C Laurent, AG Ramsay, A Quillet-Mary, JJ Fournie, M Poupot, and L Ysebaert. Nurse-like cells impact on disease progression in chronic lymphocytic leukemia. *Blood cancer journal*, 6(1):  
723 e381–e381, 2016.
- 724 28. Jan A Burger, Meike Burger, and Thomas J Kipps. Chronic lymphocytic leukemia b cells express functional cxcr4 chemokine receptors that mediate spontaneous migration beneath bone marrow  
725 stromal cells. *Blood, The Journal of the American Society of Hematology*, 94(11):3658–3667, 1999.
- 726 29. Jan A Burger and Thomas J Kipps. Chemokine receptors and stromal cells in the homing and homeostasis of chronic lymphocytic leukemia b cells. *Leukemia & lymphoma*, 43(3):461–466, 2002.
- 727 30. Frédéric Boissard, Marie Tosolini, Laetitia Ligat, Anne Quillet-Mary, Frederic Lopez, Jean-Jacques Fournié, Loïc Ysebaert, and Mary Poupot. Nurse-like cells promote cll survival through lfa-3/cd2  
728 interactions. *Oncotarget*, 8(32):52225, 2017.
- 729 31. Hugo Talbot, Sofiane Saada, Elodie Barthout, Paul-François Gallet, Nathalie Gachard, Julie Abraham, Arnaud Jaccard, Danielle Troutaud, Fabrice Lalloué, Thomas Naves, et al. Bdnf belongs to the  
730 nurse-like cell secretome and supports survival of b chronic lymphocytic leukemia cells. *Scientific reports*, 10(1):1–9, 2020.
- 731 32. Mitsufumi Nishio, Tomoyuki Endo, Nobuhiro Tsukada, Junko Ohata, Shinichi Kitada, John C Reed, Nathan J Zvaifler, and Thomas J Kipps. Nurselike cells express baf and april, which can promote  
732 survival of chronic lymphocytic leukemia cells via a paracrine pathway distinct from that of sdf-1 $\alpha$ . *Blood*, 106(3):1012–1020, 2005.
- 733 33. Charles M Macal and Michael J North. Agent-based modeling and simulation. In *Proceedings of the 2009 Winter Simulation Conference (WSC)*, pages 86–98. IEEE, 2009.
- 734 34. Gary An, Qi Mi, Joyeeta Dutta-Moscato, and Yoram Vodovotz. Agent-based models in translational systems biology. *Wiley Interdisciplinary Reviews: Systems Biology and Medicine*, 1(2):159–171,  
735 2009.
- 736 35. Zhihui Wang, Joseph D Butner, Romica Kerketta, Vittorio Cristini, and Thomas S Deisboeck. Simulating cancer growth with multiscale agent-based modeling. In *Seminars in cancer biology*,  
737 volume 30, pages 70–78. Elsevier, 2015.
- 738 36. Angela Reynolds, Jonathan Rubin, Gilles Clermont, Judy Day, Yoram Vodovotz, and G Bard Ermentrout. A reduced mathematical model of the acute inflammatory response: I. derivation of model and  
739 analysis of anti-inflammation. *Journal of theoretical biology*, 242(1):220–236, 2006.
- 740 37. Erin N Bodine, Robert M Panoff, Eberhard O Voit, and Anton E Weisstein. Agent-based modeling and simulation in mathematics and biology education. *Bulletin of Mathematical Biology*, 82(8):1–19,  
741 2020.
- 742 38. Dimitrios Voukantsis, Kenneth Kahn, Martin Hadley, Rowan Wilson, and Francesca M Buffa. Modeling genotypes in their microenvironment to predict single-and multi-cellular behavior. *GigaScience*, 8  
743 (3):giz010, 2019.
- 744 39. Boris Aguilar, David L Gibbs, David J Reiss, Mark McConnell, Samuel A Danziger, Andrew Dervan, Matthew Trotter, Douglas Bassett, Robert Hershberg, Alexander V Ratushny, et al. A generalizable  
745 data-driven multicellular model of pancreatic ductal adenocarcinoma. *GigaScience*, 9(7):giaa075, 2020.
- 746 40. Angela Schulz, Claudia Dürr, Thorsten Zenz, Hartmut Döhner, Stephan Stilgenbauer, Peter Lichter, and Martina Seiffert. Lenalidomide reduces survival of chronic lymphocytic leukemia cells in  
747 primary cocultures by altering the myeloid microenvironment. *Blood, The Journal of the American Society of Hematology*, 121(13):2503–2511, 2013.
- 748 41. Geoffrey Clapp and Doron Levy. A review of mathematical models for leukemia and lymphoma. *Drug Discovery Today: Disease Models*, 16:1–6, 2015.
- 749 42. Kerri-Ann Norton, Travis Wallace, Niranjana B Pandey, and Aleksander S Popel. An agent-based model of triple-negative breast cancer: the interplay between chemokine receptor ccr5 expression,  
750 cancer stem cells, and hypoxia. *BMC systems biology*, 11(1):1–15, 2017.
- 751 43. Kerri-Ann Norton, Chang Gong, Samira Jamalian, and Aleksander S Popel. Multiscale agent-based and hybrid modeling of the tumor immune microenvironment. *Processes*, 7(1):37, 2019.
- 752 44. Gianluca D'Antonio, Paul Macklin, and Luigi Preziosi. An agent-based model for elasto-plastic mechanical interactions between cells, basement membrane and extracellular matrix. *Mathematical*

- 753 *biosciences and engineering: MBE*, 10(1):75, 2013.
- 754 45. Yafei Wang, Heber Rocha, Randy Heiland, and Paul Macklin. Simulation of drug-loaded nanoparticles on cancer treatment: an agent-based modelling approach. In *2021 Joint Mathematics Meetings*
- 755 *(JMM)*. AMS, 2021.
- 756 46. Seyed Peyman Shariatpanahi, Seyed Pooya Shariatpanahi, Keivan Madjidzadeh, Moustapha Hassan, and Manuchehr Abedi-Valugerdi. Mathematical modeling of tumor-induced immunosuppression
- 757 by myeloid-derived suppressor cells: Implications for therapeutic targeting strategies. *Journal of theoretical biology*, 442:1–10, 2018.
- 758 47. Nicoline Y den Breems and Raluca Eftimie. The re-polarisation of m2 and m1 macrophages and its role on cancer outcomes. *Journal of theoretical biology*, 390:23–39, 2016.
- 759 48. Raluca Eftimie and Charlotte Barelle. Mathematical investigation of innate immune responses to lung cancer: The role of macrophages with mixed phenotypes. *Journal of Theoretical Biology*, 524:
- 760 110739, 2021.
- 761 49. Szabolcs Suveges, Raluca Eftimie, and Dumitru Trucu. Re-polarisation of macrophages within collective tumour cell migration: a multiscale moving boundary approach. *Frontiers in Applied*
- 762 *Mathematics and Statistics*, 7:799650, 2022.
- 763 50. Raluca Eftimie, Joseph J Gillard, and Doreen A Cantrell. Mathematical models for immunology: current state of the art and future research directions. *Bulletin of mathematical biology*, 78(10):
- 764 2091–2134, 2016.
- 765 51. Niloofar Nickaeen, Jafar Ghaisari, Monika Heiner, Shiva Moein, and Yousof Gheisari. Agent-based modeling and bifurcation analysis reveal mechanisms of macrophage polarization and phenotype
- 766 pattern distribution. *Scientific reports*, 9(1):1–14, 2019.
- 767 52. Ahmadreza Ghaffarizadeh, Randy Heiland, Samuel H Friedman, Shannon M Mumenthaler, and Paul Macklin. Physicell: An open source physics-based cell simulator for 3-d multicellular systems.
- 768 *PLoS computational biology*, 14(2):e1005991, 2018.
- 769 53. Gaëlle Letort, Arnau Montagud, Gautier Stoll, Randy Heiland, Emmanuel Barillot, Paul Macklin, Andrei Zinovyev, and Laurence Calzone. Physiboss: a multi-scale agent-based modelling framework
- 770 integrating physical dimension and cell signalling. *Bioinformatics*, 35(7):1188–1196, 2019.
- 771 54. Elizabeth Sklar. Netlogo, a multi-agent simulation environment. *Artificial life*, 13(3):303–311, 2007.
- 772 55. Seth Tisue and Uri Wilensky. Netlogo: A simple environment for modeling complexity. In *International conference on complex systems*, volume 21, pages 16–21. Boston, MA, 2004.
- 773 56. Romain Reuillon, Mathieu Leclaire, and Sebastien Rey-Coyrehourcq. Openmole, a workflow engine specifically tailored for the distributed exploration of simulation models. *Future Generation*
- 774 *Computer Systems*, 29(8):1981–1990, 2013.
- 775 57. Andrea Bürkle, Matthias Niedermeier, Annette Schmitt-Gräff, William G Wierda, Michael J Keating, and Jan A Burger. Overexpression of the cxcr5 chemokine receptor, and its ligand, cxcl13 in b-cell
- 776 chronic lymphocytic leukemia. *Blood, The Journal of the American Society of Hematology*, 110(9):3316–3325, 2007.
- 777 58. Cédric Schleiss, Wassila Ilias, Ouria Tahar, Yonca Güler, Laurent Miguët, Caroline Mayeur-Rousse, Laurent Mauvieux, Luc-Matthieu Fornecker, Elise Toussaint, Raoul Herbrecht, et al. Bcr-associated
- 778 factors driving chronic lymphocytic leukemia cells proliferation ex vivo. *Scientific reports*, 9(1):1–12, 2019.
- 779 59. Marco V Haselager, Arnon P Kater, and Eric Eldering. Proliferative signals in chronic lymphocytic leukemia; what are we missing? *Frontiers in Oncology*, 10:592205, 2020.
- 780 60. Paola Italiani and Diana Boraschi. From monocytes to m1/m2 macrophages: phenotypical vs. functional differentiation. *Frontiers in immunology*, 5:514, 2014.
- 781 61. Kalyanmoy Deb. Evolutionary algorithms. In *Multi-objective optimization using evolutionary algorithms*, pages 81–170. John Wiley & Sons, Ltd, 2001.
- 782 62. Kalyanmoy Deb, Amrit Pratap, Sameer Agarwal, and TAMT Meyarivan. A fast and elitist multiobjective genetic algorithm: Nsga-ii. *IEEE transactions on evolutionary computation*, 6(2):182–197, 2002.
- 783 63. Simon L Newman, Michelle A Tucci, et al. Regulation of human monocyte/macrophage function by extracellular matrix. adherence of monocytes to collagen matrices enhances phagocytosis of
- 784 opsonized bacteria by activation of complement receptors and enhancement of fc receptor function. *The Journal of clinical investigation*, 86(3):703–714, 1990.
- 785 64. Natasja A Otto, Joe M Butler, Ivan Ramirez-Moral, Michel van Weeghel, Jeroen WJ van Heijst, Brendon P Scicluna, Rieklert H Houtkooper, Alex F de Vos, and Tom van der Poll. Adherence affects
- 786 monocyte innate immune function and metabolic reprogramming after lipopolysaccharide stimulation in vitro. *The Journal of Immunology*, 206(4):827–838, 2021.
- 787 65. Eileen Uribe-Querol and Carlos Rosales. Phagocytosis: our current understanding of a universal biological process. *Frontiers in Immunology*, 11:1066, 2020.
- 788 66. Cuthbert Daniel. One-at-a-time plans. *Journal of the American statistical association*, 68(342):353–360, 1973.
- 789 67. Marcin Domagala, Łoic Ysebaert, Laetitia Ligat, Frederic Lopez, Jean-Jacques Fournié, Camille Laurent, and Mary Poupot. Il-10 rescues cll survival through repolarization of inflammatory nurse-like
- 790 cells. *Cancers*, 14(1):16, 2022.
- 791 68. Daphne R Friedman, Alexander B Sibley, Kouros Owzar, Kari G Chaffee, Susan Slager, Neil E Kay, Curtis A Hanson, Wei Ding, Tait D Shanafelt, J Brice Weinberg, et al. Relationship of blood
- 792 monocytes with chronic lymphocytic leukemia aggressiveness and outcomes: a multi-institutional study. *American journal of hematology*, 91(7):687–691, 2016.
- 793 69. Osman Yokus, Esmâ Nur Saglam, Hasan Goze, Fettah Sametoglu, and Istemi Serin. Prognostic role of lymphocyte/monocyte ratio in chronic lymphocytic leukemia. *Journal of Hematology*, 9(4):116,
- 794 2020.
- 795 70. Ana E Rodriguez-Vicente, Marcos González Díaz, and Jesús M Hernández-Rivas. Chronic lymphocytic leukemia: a clinical and molecular heterogenous disease. *Cancer genetics*, 206(3):49–62,
- 796 2013.
- 797 71. Marc Lecoulter, Valérie Dutoit, and Paul R Walker. Phagocytic function of tumor-associated macrophages as a key determinant of tumor progression control: a review. *Journal for Immunotherapy of*
- 798 *Cancer*, 8(2), 2020.
- 799 72. Xuefei Zhou, Xiangrui Liu, and Leaf Huang. Macrophage-mediated tumor cell phagocytosis: opportunity for nanomedicine intervention. *Advanced Functional Materials*, 31(5):2006220, 2021.
- 800 73. Subhra K Biswas and Alberto Mantovani. Orchestration of metabolism by macrophages. *Cell metabolism*, 15(4):432–437, 2012.

- 801 74. Kamiya Mehla and Pankaj K Singh. Metabolic regulation of macrophage polarization in cancer. *Trends in cancer*, 5(12):822–834, 2019.
- 802 75. Nupur Bhattacharya, Susanne Diener, Irina S Idler, Judith Rauhen, Sarah Häbe, Hauke Busch, Annett Habermann, Thorsten Zenz, Hartmut Döhner, Stephan Stilgenbauer, et al. Nurse-like cells show  
803 deregulated expression of genes involved in immunocompetence. *British journal of haematology*, 154(3):349–356, 2011.
- 804 76. Shalini Gautam, Kavin Fatehchand, Saranya Elavazhagan, Brenda F Reader, Li Ren, Xiaokui Mo, John C Byrd, Susheela Tridandapani, and Jonathan P Butchar. Reprogramming nurse-like cells with  
805 interferon  $\gamma$  to interrupt chronic lymphocytic leukemia cell survival. *Journal of Biological Chemistry*, 291(27):14356–14362, 2016.
- 806 77. Sarah Cadot, Carine Valle, Marie Tosolini, Frederic Pont, Laetitia Largeaud, Camille Laurent, Jean Jacques Fournie, Loic Ysebaert, and Anne Quillet-Mary. Longitudinal cite-seq profiling of chronic  
807 lymphocytic leukemia during ibrutinib treatment: evolution of leukemic and immune cells at relapse. *Biomarker research*, 8(1):1–13, 2020.
- 808 78. Binyamin A Knisbacher, Ziao Lin, Cynthia K Hahn, Ferran Nadeu, Marti Duran-Ferrer, Kristen E Stevenson, Eugen Tausch, Julio Delgado, Alex Barbera-Mourelle, Amaro Taylor-Weiner, et al. Molecular  
809 map of chronic lymphocytic leukemia and its impact on outcome. *Nature Genetics*, pages 1–11, 2022.
- 810 79. Pauline Robbe, Kate E Ridout, Dimitrios V Vavoulis, Helene Dréau, Ben Kinnersley, Nicholas Denny, Daniel Chubb, Niamh Appleby, Anthony Cutts, Alex J Cornish, et al. Whole-genome sequencing of  
811 chronic lymphocytic leukemia identifies subgroups with distinct biological and clinical features. *Nature Genetics*, pages 1–15, 2022.
- 812 80. Kodi S Ravichandran. Beginnings of a good apoptotic meal: the find-me and eat-me signaling pathways. *Immunity*, 35(4):445–455, 2011.
- 813 81. Mark P Chao, Ash A Alizadeh, Chad Tang, June H Myklebust, Bindu Varghese, Saar Gill, Max Jan, Adriel C Cha, Charles K Chan, Brent T Tan, et al. Anti-cd47 antibody synergizes with rituximab to  
814 promote phagocytosis and eradicate non-hodgkin lymphoma. *Cell*, 142(5):699–713, 2010.
- 815 82. CH Takimoto, MP Chao, C Gibbs, MA McCamish, J Liu, JY Chen, R Majeti, and IL Weissman. The macrophage 'do not eat me' signal, cd47, is a clinically validated cancer immunotherapy target.  
816 *Annals of Oncology*, 30(3):486–489, 2019.
- 817 83. Nili Dezorella, Sigi Kay, Shoshana Baron, Mika Shapiro, Ziv Porat, Varda Deutsch, Yair Herishanu, and Ben-Zion Katz. Measurement of lymphocyte aggregation by flow cytometry—physiological  
818 implications in chronic lymphocytic leukemia. *Cytometry Part B: Clinical Cytometry*, 90(3):257–266, 2016.
- 819 84. Pauline Gravelle, Christine Jean, Julien Familiades, Emilie Decaup, Amandine Blanc, Christine Bezombes-Cagnac, Camille Laurent, Ariel Savina, Jean-Jacques Fournié, and Guy Laurent. Cell growth  
820 in aggregates determines gene expression, proliferation, survival, chemoresistance, and sensitivity to immune effectors in follicular lymphoma. *The American journal of pathology*, 184(1):282–295,  
821 2014.
- 822 85. Stefania Fiorcari, Rossana Maffei, Valentina Audrito, Silvia Martinelli, Elisa Ten Hacken, Patrizia Zucchini, Giulia Grisendi, Leonardo Potenza, Mario Luppi, Jan A Burger, et al. Ibrutinib modifies the  
823 function of monocyte/macrophage population in chronic lymphocytic leukemia. *Oncotarget*, 7(40):65968, 2016.
- 824 86. David Tyler Sweeney, Hiberno Ho, Christopher A Eide, Angela Rofelty, Anupriya Agarwal, Selina Qiuying Liu, Alexey V Danilov, Patrice Lee, David Chantry, Shannon K McWeeney, et al. Targeting of  
825 colony-stimulating factor 1 receptor (csf1r) in the cl microenvironment yields antineoplastic activity in primary patient samples. *Oncotarget*, 9(37):24576, 2018.
- 826 87. Avery Polk, Ye Lu, Tianjiao Wang, Erlene Seymour, Nathanael G Bailey, Jack W Singer, Philip S Boonstra, Megan S Lim, Sami Malek, and Ryan A Wilcox. Colony-stimulating factor-1 receptor is  
827 required for nurse-like cell survival in chronic lymphocytic leukemia. *Clinical Cancer Research*, 22(24):6118–6128, 2016.
- 828 88. Alexis Coullomb and Vera Pancaldi. TysseRand—fast and accurate reconstruction of spatial networks from bioimages. *Bioinformatics*, 37(21):3989–3991, 2021.
- 829 89. Karl Francis and Bernhard O Palsson. Effective intercellular communication distances are determined by the relative time constants for cyto/chemokine secretion and diffusion. *Proceedings of the*  
830 *National Academy of Sciences*, 94(23):12258–12262, 1997.
- 831 90. Alon Oyler-Yaniv, Jennifer Oyler-Yaniv, Benjamin M Whitlock, Zhiduo Liu, Ronald N Germain, Morgan Huse, Grégoire Altan-Bonnet, and Oleg Krivevsky. A tunable diffusion-consumption mechanism  
832 of cytokine propagation enables plasticity in cell-to-cell communication in the immune system. *Immunity*, 46(4):609–620, 2017.
- 833 91. Rajeev Kumar and Peter Rockett. Improved sampling of the pareto-front in multiobjective genetic optimizations by steady-state evolution: a pareto converging genetic algorithm. *Evolutionary*  
834 *computation*, 10(3):283–314, 2002.
